# Supplementary material for: Exploring Historical Australian Expeditions with Time-Layered Cultural Maps
Source: MDPI journal article supplement (doi:10.3390/ijgi12030104), 2023-03-02
Supplement: s1 [file s1]

Archive with 5 entries (5 files):
- Figure S1-John Forrest.jpg
- Supplementary file S1-Tutorial - TimeMapper.pdf
- Supplementary file S2-Tutorial - TourBuilder.pdf
- Table S1-Explorations in Australia.xlsx
- Table S2-GoogleSpreadsheet.xlsx
