# Supplementary material for: Exploring Historical Australian Expeditions with Time-Layered Cultural Maps
Source: MDPI journal article supplement (doi:10.3390/ijgi12030104), 2023-03-02
Supplement: s1 [file s1 › Supplementary file S2-Tutorial - TourBuilder.pdf]

Title: Create time layered map in Tour Builder

Date: 9th October 2020

Author: Feiyan Yu

Purpose: Outlines the process in Tour Builder to create an interactive time layered map for demonstrating John Forrest's first exploration into interior Western Australia. The data is provided in Excel sheet format which is the annotation results from John Forrest's book *Explorations in Australia* using annotation tool Recogito/TMT developed by TLCMap project.

Tags: TLCMap, time layered map, TimeMapper

<https://tourbuilder.withgoogle.com/builder#play/ahJzfmd3ZWltdG91cmJ1aWxkZXJyEQsSBFRvdXIYglDggrbS1QkM>

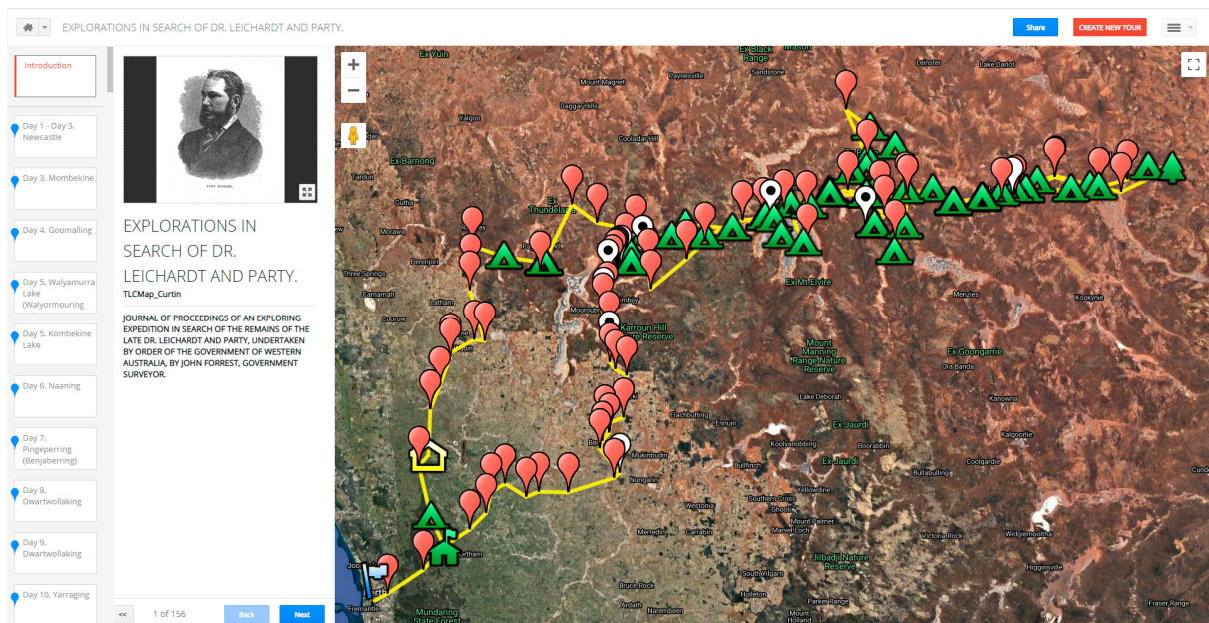

## 1. Introduce Tour Builder

[Tour Builder](#) is a free web-based tool provided by Google that lets you easily create time maps by adding texts, photos and videos to a sequence of locations on Earth, and then share with other people. A time map created with Tour Builder has three major components. First component is the main window which shows a geomap (right hand side of the above figure). Next to it is the text window where texts, images and other media can be displayed. The left side of the figure is the last component, the timeline. The three components are inter-related, actions on any component will lead to the reactions on other two components. For example, click on any location icon on the geomap, the timeline and the text window will change to the content relevant to the location.

## 2. Get started with Tour Builder

2.1 Click on the link [here](#) to go to the Tour Builder website. And click on the red 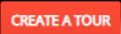 button to start creating a tour. You will need a Google account to login.

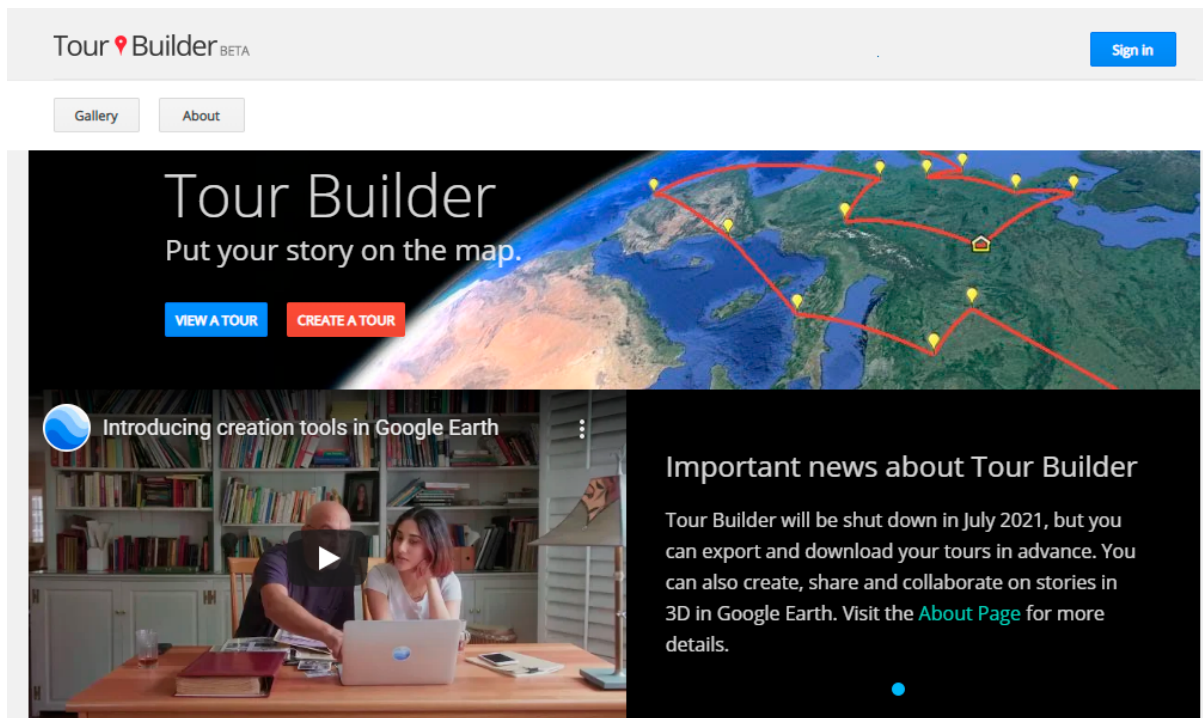

2.2 Enter a tour name and author name, then hit **Create Tour** in the pop-up window.

✕

# Let's get started.

Give your tour a name and you'll be on your way.

Tour Name

Explorations in Australia - Tutorial

Author name (that's you or your organization)

TLCMap\_Curtin

Don't worry, your tour is completely private until you decide to share it with others.

As a reminder, Tour Builder will be shut down. Be sure to export or download your tour before July 2021.  
[Learn More.](#)

Tours are subject to our [Terms of Service](#) and [Content Policy](#).

Create Tour

2.3 First page is an introduction about the expedition. The **TOUR NAME** and **AUTHOR NAME** fields have been populated based on the input in the last step.

Explorations in Australia - TutorialSave Now Done Editing

Introduction

+ Add Location

Need help? Check out our tutorial.

TOUR NAME  
Explorations in Australia - Tutorial

AUTHOR NAME (THAT'S YOU)  
TLCMap\_Curtin

SELECT AN INTRODUCTION PICTURE  

Add a Photo

TELL THE STORY  

What's a good summary for this tour?

TYPE OF STORY  
Story 3D

PATH COLOR  
Yellow

ADVANCED OPTIONS

© 2020 Google Terms of Service Privacy Policy Feedback

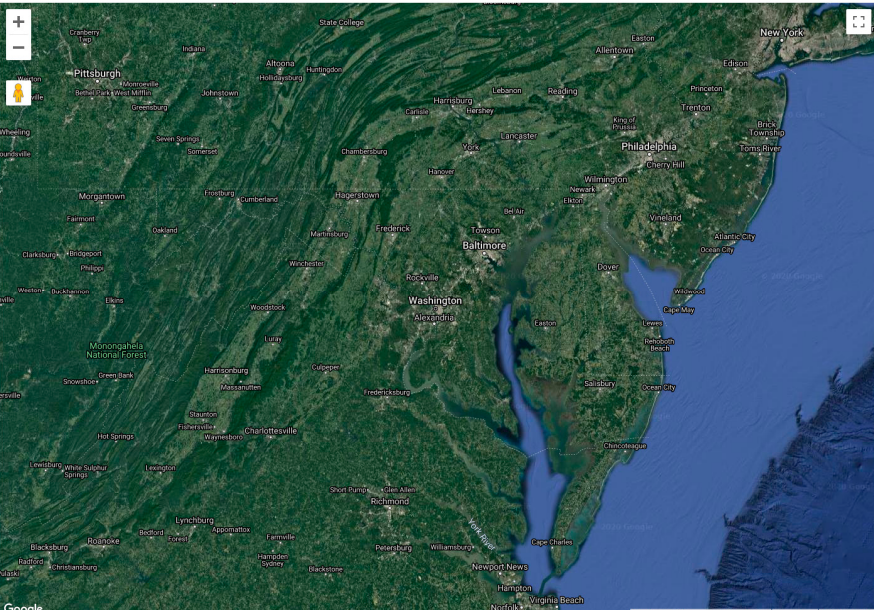

3

2.4 Under the **SELECT AN INTRODUCTION PICTURE**, click on **Add a Photo**, and then hit **Upload photos** tab in the pop-up window to select the **John Forrest.jpg** from your local tutorial folder.

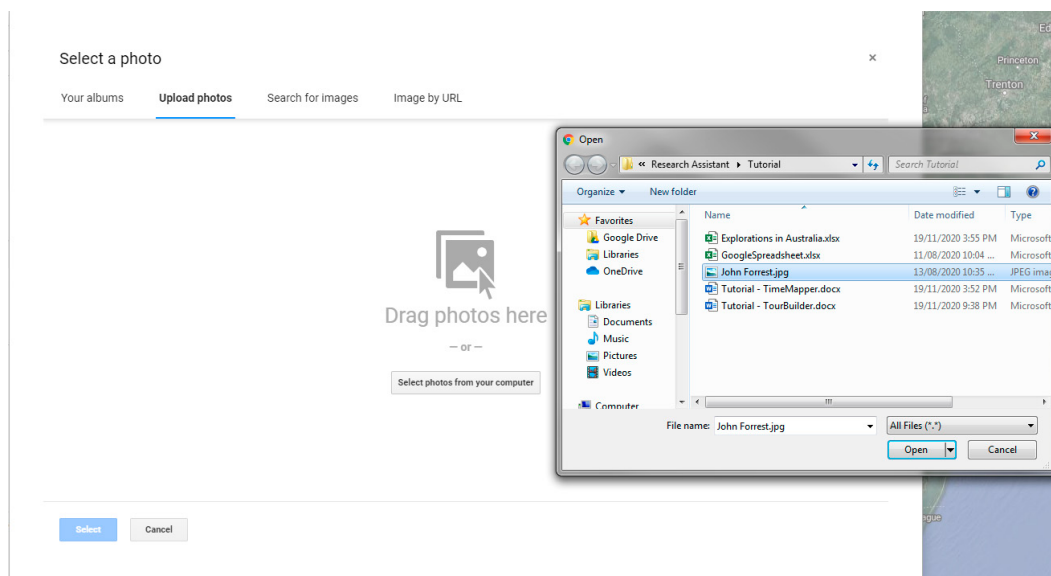

2.5 John Forrest's portrait is loaded into the field. Then click on the pencil icon to add a caption for the image.

Introduction

+ Add Location

Need help? Check out our tutorial.

TOUR NAME

Explorations in Australia - Tutorial

AUTHOR NAME (THAT'S YOU)

TLCMap\_Curtin

SELECT AN INTRODUCTION PICTURE

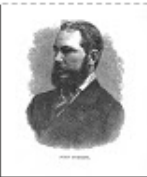

Edit media's caption

TELL THE STORY

**B** *I* U [Link](#) 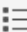 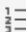 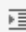 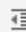 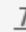

*What's a good summary for this tour?*

2.6 Add a brief introduction about the expedition. Put the following text into the **TELL THE STORY** field:

JOURNAL OF PROCEEDINGS OF AN EXPLORING EXPEDITION IN SEARCH OF THE REMAINS OF THE LATE DR. LEICHARDT AND PARTY, UNDERTAKEN BY ORDER OF THE GOVERNMENT OF WESTERN AUSTRALIA, BY JOHN FORREST, GOVERNMENT SURVEYOR.

2.7 keep other default settings.

**TELL THE STORY**

**B** *I* U [Link](#) 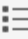 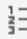 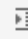 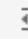 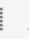 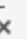

JOURNAL OF PROCEEDINGS OF AN EXPLORING  
EXPEDITION IN SEARCH OF THE REMAINS OF  
THE LATE DR. LEICHARDT AND PARTY,  
UNDERTAKEN BY ORDER OF THE  
GOVERNMENT OF WESTERN AUSTRALIA, BY  
JOHN FORREST, GOVERNMENT SURVEYOR.

**TYPE OF STORY**

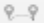 Story 3D 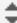

**PATH COLOR**

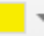 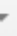

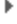 **ADVANCED OPTIONS**

### 3. Add locations to the expedition.

3.1 Click on the blue button **+ Add Location** to start adding in location. Open the data file *Explorations in Australia.xlsx* in your local tutorial folder. Copy the *Location* column in the first row and paste into *Start typing a location* field then hit **Enter**. A location icon is created, then hit the blue button **Add to Tour**.

| QUOTE TRANSCRIPTION | VOCAB LABEL          | LAT       | LNG      | Location           | TAGS       |
|---------------------|----------------------|-----------|----------|--------------------|------------|
| Newcastle           | Newcastle Bridge     | -31.54917 | 116.4625 | -31.54917,116.4625 | 17/04/1869 |
| Mombekine           | Mombekine            | -31.42376 | 116.6848 | -31.42376,116.6848 | 19/04/1869 |
| Goomalling          | Goomalling, Shire Of | -31.29987 | 116.8312 | -31.29987,116.8312 | 20/04/1869 |
| Walyamurra Lake     | Walyormouring Lake   | -31.14904 | 116.8734 | -31.14904,116.8734 | 21/04/1869 |
| Kombekine Lake      | Lake Koombekine      | -31.0832  | 116.9909 | -31.0832,116.9909  | 21/04/1869 |
| Naaning             | Naaning Well         | -31.1807  | 117.1817 | -31.1807,117.1817  | 22/04/1869 |

The interface shows a sidebar with 'Introduction' and 'New Location' sections. The 'New Location' section has a '+ Add Location' button. The main area has a search bar labeled 'Start typing a location...'. In the second screenshot, the coordinates '-31.54917,116.4625' are entered into the search bar, and a location pin icon with the coordinates is displayed below it, along with an 'Add to tour' button.

3.2 A location icon will be created on the geomap and attribute fields for the location are activate. You can start adding in the attributes.

The interface shows a map with a location pin at the coordinates -31.54917,116.4625. The sidebar on the left contains the following fields:

- LOCATION NAME:** -31.54917,116.4625
- ENHANCE THE STORY:** Add Photos & Videos (You may add up to 25 total)
- START DATE:** Month, Day, optional year
- END DATE:** Month, Day, optional year
- INTRODUCTION (WHAT'S IT ABOUT?):** Tell your audience about this location...
- LOCATION ICON:** Change icon
- ADVANCED OPTIONS:** (Link to Google Terms of Service, Privacy Policy, Feedback)

The map on the right shows a satellite view of the area around Newcastle, Australia, with several other location pins and labels like 'Newcastle Bridge', 'Toodyay District High School', and 'Newcastle East Museum'.

3.3 A location icon will be created on the geomap and attribute fields for the location are activated. You can start adding in the attributes.

- 1) Use the value of [QUOTE\\_TRANSCRIPTION](#) column (place name quoted from original text) to fill in the [LOCATION NAME](#) field; followed by the value of [VOCAB\\_LABEL](#) column (place name in gazetteer) with a bracket if they are different. Enter the day info in the [LOCATION NAME](#) field as well (optional).
- 2) Use the date info in the [TAGS](#) column to set the [START DATE](#). [END DATE](#) value is optional.
- 3) Go to the journal [website](#) to copy the original journal texts that related to the location and the date into the [INTRODUCTION](#) field.
- 4) Click on **Change Icon** and select a location icon you prefer.

| QUOTE_TRANSCRIPTION | VOCAB_LABEL          | LAT       | LONG     | Location           | TAGS       |
|---------------------|----------------------|-----------|----------|--------------------|------------|
| Newcastle           | Newcastle Bridge     | -31.54917 | 116.4625 | -31.54917,116.4625 | 17/04/1869 |
| Mombekine           | Mombekine            | -31.42376 | 116.6948 | -31.42376,116.6948 | 19/04/1869 |
| Goomalling          | Goomalling, Shire Of | -31.29987 | 116.8312 | -31.29987,116.8312 | 20/04/1869 |
| Walyamurra Lake     | Walyamurra Lake      | -31.14904 | 116.6734 | -31.14904,116.6734 | 21/04/1869 |
| Kombekine Lake      | Lake Kombekine       | -31.0832  | 116.9909 | -31.0832,116.9909  | 21/04/1869 |
| Naaming             | Naaming Well         | -31.1807  | 117.1817 | -31.1807,117.1817  | 22/04/1869 |

Need help? Check out our tutorial.

LOCATION NAME: Day 1 - Day 3, Newcastle (Newcastle Br)

ENHANCE THE STORY

Add Photos & Videos  
You may add up to 25 total

START DATE: Apr 17 1869

END DATE: Apr 19 1869

INTRODUCTION (WHAT'S IT ABOUT?)

you, the exploring party under my command consisted of the following persons, namely, Mr. George Monger, as second in command, Mr. Malcolm Hamersley, as third in command, probation prisoner, David Morgan, as shoeing smith, and two natives (Tommy Windich and Jimmy Mungaro). The latter native gave Mr. J.H. Monger the information respecting the murder of white men in the eastward.

Reached Newcastle on the 17th April 1869. Reached Mombekine, with a three-horse cart and teamster and thirteen horses, making a total of sixteen horses. Reached Mombekine, which is about sixteen miles East-North-East from Newcastle.

LOCATION ICON: Change Icon

ADVANCED OPTIONS

Google Maps

CUSTOMIZE VIEW: Pan/Zoom, Center placemark, Lock this view, BACK

Sir

In pursuance of instructions received from you, the exploring party under my command consisted of the following persons, namely, Mr. George Monger as second in command, Mr. Malcolm Hamersley, as third in command, probation prisoner, David Morgan, as shoeing smith, and two natives (Tommy Windich and Jimmy Mungaro). The latter native gave Mr. J.H. Monger the information respecting the murder of white men in the eastward.

Reached Newcastle on the 17th April 1869. Reached Mombekine, with a three-horse cart and teamster and thirteen horses, making a total of sixteen horses. Reached Mombekine, which is about sixteen miles East-North-East from Newcastle.

April 20th  
Continued journey to Goomalling, sixteen miles, which we reached at 1 p.m.

21st.

Copy Ctrl-C  
Print... Ctrl-P  
Inspect Ctrl-Shift-I

Search 谷歌搜索 for "Sir: In pursuance of instructions received from..."  
gations, etc., for a final start.

3.4 Once happy with all the attributes, click on **+ Add Location** to add in another location. Repeat step 3.1 to step 3.3.

3.5 Continue until you add in the whole journey. Then click on **Done Editing** in the top right corner to save you work.

Note: [GoogleSpreadsheet.xlsx](#) file also includes all the information needed for attribute inputs.
