# Supplementary material for: Exploring Historical Australian Expeditions with Time-Layered Cultural Maps
Source: MDPI journal article supplement (doi:10.3390/ijgi12030104), 2023-03-02
Supplement: s1 [file s1 › Table S1-Explorations in Australia.xlsx]

## Sheet: Sheet1
QUOTE_TRANSCRIPTION	VOCAB_LABEL	LAT	LNG	Location	TAGS
Newcastle	Newcastle Bridge	-31.5492	116.463	-31.54917,116.4625	17/04/1869
Mombekine	Moombekine	-31.4238	116.685	-31.42376,116.6848	19/04/1869
Goomalling	Goomalling, Shire Of	-31.2999	116.831	-31.29987,116.8312	20/04/1869
Walyamurra Lake	Walyormouring Lake	-31.149	116.873	-31.14904,116.8734	21/04/1869
Kombekine Lake	Lake Koombekine	-31.0832	116.991	-31.0832,116.9909	21/04/1869
Naaning	Naaning Well	-31.1807	117.182	-31.1807,117.1817	22/04/1869
Pingeperring	Benjaberring	-31.1436	117.29	-31.14361,117.2897	23/04/1869
Dwartwollaking	Dwortwollaking Spring	-31.1476	117.546	-31.14764,117.5456	24/04/1869
Yarraging	Yarragin Well	-31.0396	117.95	-31.03958,117.9501	26/04/1869
Waddowring	lat/long	-31	118	-31118	27/04/1869
Cartubing	Cartubing	-30.8179	117.822	-30.81791,117.822	28/04/1869
Inkanyinning	Inkanyinning	-30.7626	117.847	-30.76263,117.847	28/04/1869
Yammaling	Yammaling	-30.6993	117.906	-30.6993,117.9062	28/04/1869
Beebynyinning	Beebeegnying Hills	-30.636	117.866	-30.63596,117.8656	29/04/1869
Cartubing	Cartubing	-30.8179	117.822	-30.81791,117.822	29/04/1869
Inkanyinning	Inkanyinning	-30.7626	117.847	-30.76263,117.847	30/04/1869
Yammaling	Yammaling	-30.6993	117.906	-30.6993,117.9062	30/04/1869
Beebynyinning	Beebeegnying Hills	-30.636	117.866	-30.63596,117.8656	30/04/1869
Danjinning	Danjinning	-30.5874	118.034	-30.58735,118.034	01/05/1869
Danjinning	Danjinning	-30.5874	118.034	-30.58735,118.034	02/05/1869
Yalburnunging	Yalburnunging Rockholes	-30.2668	118.058	-30.26679,118.0584	03/05/1869
Billeburring	Billiburning Rock	-30.1712	117.912	-30.17124,117.912	04/05/1869
Gnaragnunging	Gnaragnunging Rock	-30.2207	117.959	-30.22068,117.9592	4/05/1869
Mount Churchman	Mount Churchman	-29.9271	117.908	-29.92707,117.9078	05/05/1869
Coolee	?	-30.0777	117.908	-30.077740, 117.907944	05/05/1869
Woodgine	Woodgine Waterhole	-29.7904	117.848	-29.7904,117.8484	06/05/1869
Lake Moore	?	-29.7462	117.858	-29.746195, 117.857973	06/05/1869
Cundierring	Cundierring Hill	-29.7015	117.889	-29.70151,117.8892	06/05/1869
Curroning	?	-29.5286	117.897	-29.528634, 117.896849	07/05/1869
Yeergolling	Yeergolling Waterhole	-29.4957	117.935	-29.49567,117.9348	08/05/1869
Gnurra	Gnurra Waterhole	-29.4562	117.96	-29.45623,117.9595	08/05/1869
Munnarra	Munnarra Waterhole	-29.4421	117.972	-29.44206,117.972	08/05/1869
Coorbedar	?	-29.4254	118.008	-29.425359,118.007555	08/05/1869
Dowgooroo	Dowgooroo	-29.4354	117.981	-29.4354,117.9809	09/05/1869
CampSite	lat/long	-29.4119	118.1	-29.411944,118.1	09/05/1869
Warne River	?	-29.3474	118.196	-29.347389, 118.195744	10/05/1869
CampSite	?	-29.3557	118.098	-29.355722, 118.097998	10/05/1869
Dowgooroo	Dowgooroo	-29.4354	117.981	-29.4354,117.9809	11/05/1869
CampSite	?	-29.3557	118.098	-29.355722, 118.097998	12/05/1869
Durkying	Durkying	-29.4493	118.245	-29.44928,118.2448	13/05/1869
Mingan	Mingan	-29.6104	118.267	-29.6104,118.2667	14/05/1869
Earroo	lat/long	-29.3842	118.583	-29.384167,118.583333	15/05/1869
Earroo	lat/long	-29.3842	118.583	-29.384167,118.583333	16/05/1869
Croobenyer	Croobenyer Rockhole	-29.2498	118.743	-29.24983,118.7425	17/05/1869
CampSite	?	-29.2119	118.743	-29.211944,118.7425	17/05/1869
Yeeramudder	Yerramudder Hill	-29.0843	119.068	-29.08427,119.0684	18/05/1869
island	?	-29.0755	119.315	-29.075531,119.315180	19/05/1869
CampSite	?	-29.0783	119.604	-29.078345,119.345118	19/05/1869
CampSite	?	-29.0642	119.267	-29.064167,119.266667	20/05/1869
mainland	?	-28.9963	119.432	-28.996274,119.432029	21/05/1869
CampSite	?	-29.0347	119.249	-29.06066,119.2509	22/05/1869
Retreat Rock	Retreat Rock	-29.0607	119.251	-29.06066,119.2509	23/05/1869
CampSite	?	-28.9695	119.495	-28.969489, 119.494951	24/05/1869
Yeadie	Yeedie Hill	-29.0098	119.632	-29.00982,119.632	25/05/1869
CampSite	lat/long	-28.9806	119.65	-28.980556,119.65	25/05/1869
CampSite	lat/long	-28.8638	119.826	-28.863785,119.826478	26/05/1869
CampSite	lat/long	-28.8833	119.833	-28.883333,119.833333	27/05/1869
CampSite	lat/long	-28.8928	120.15	-28.892778,120.15	28/05/1869
Mount Alexander	Mount Alexander	-28.9256	120.271	-28.92564,120.2706	29/05/1869
CampSite	lat/long	-28.8811	120.5	-28.862500,120.500000	29/05/1869
CampSite	lat/long	-28.8625	120.15	-28.892778,120.15	30/05/1869
Mount Bivou	Mount Bevon	-29.044	120.312	-29.04398,120.3117	31/05/1869
Native Camp	?	-29.1214	120.145	-29.121401,120.144845	31/05/1869
CampSite	?	-29.1214	120.225	-29.121351,120.225151	31/05/1869
CampSite	lat/long	-28.8811	120.5	-28.862500,120.500000	01/06/1869
Two-spring	Two Springs	-28.8811	120.514	-28.88111,120.5139	02/06/1869
CampSite	?	-28.7926	120.267	-28.792575,120.267093	03/06/1869
CampSite	?	-28.7128	120.024	-28.712838,120.024299	04/06/1869
Depot Spring	Depot Spring	-28.6131	120.162	-28.61314,120.1623	05/06/1869
Depot Spring	Depot Spring	-28.6131	120.162	-28.61314,120.1623	06/06/1869
Mount Holmes	Mount Holmes	-28.2342	119.977	-28.23425,119.9773	07/06/1869
Mount Holmes	Mount Holmes	-28.2342	119.977	-28.23425,119.9773	08/06/1869
CampSite	?	-28.3784	120.183	-28.378426,120.183152	08/06/1869
CampSite	?	-28.6891	120.151	-28.689090,120.150857	09/06/1869
CampSite	?	-28.5241	120.406	-28.524133,120.406059	10/06/1869
Two Springs	Two Springs	-28.8811	120.514	-28.88111,120.5139	11/06/1869
Two Springs	Two Springs	-28.8811	120.514	-28.88111,120.5139	12/06/1869
Two Springs	Two Springs	-28.8811	120.514	-28.88111,120.5139	13/06/1869
CampSite	?	-29.1214	120.225	-29.121351,120.225151	14/06/1869
Mount Ida	Mount Ida	-29.2287	120.403	-29.2287,120.4025	15/06/1869
CampSite	?	-29.3282	120.402	-29.328204,120.401667	15/06/1869
CampSite	?	-29.1335	120.489	-29.133529,120.488615	16/06/1869
Two Springs	Two Springs	-28.8811	120.514	-28.88111,120.5139	17/06/1869
CampSite	?	-28.8518	120.736	-28.851781,120.736079	18/06/1869
CampSite	?	-28.95	120.917	-28.95,120.916667	19/06/1869
CampSite	?	-28.95	120.917	-28.95,120.916667	20/06/1869
CampSite	lat/long	-28.8833	121.333	-28.883333,121.333333	21/06/1869
CampSite	lat/long	-28.9327	121.161	-28.916667,121.166667	22/06/1869
Mount Lenora	Mount Leonora	-28.9059	121.337	-28.90591,121.3373	23/06/1869
Mount Malcolm	Mount Malcolm	-28.8887	121.458	-28.88869,121.4578	23/06/1869
CampSite	?	-28.852	121.548	-28.852024,121.547751	23/06/1869
Mount Flora	Mount Flora	-28.7511	121.8	-28.751074,121.800098	24/06/1869
CampSite	?	-28.8263	122.106	-28.826330,122.106272	24/06/1869
Mount Margaret	Mount Margaret	-28.8314	122.191	-28.83139,122.1906	25/06/1869
Mount Flora	Mount Flora	-28.7434	121.807	-28.7434,121.8073	25/06/1869
CampSite	?	-28.7881	121.649	-28.788133,121.648675	25/06/1869
CampSite of 23rd	?	-28.852	121.548	-28.852024,121.547751	26/06/1869
A pool	?	-28.9017	121.431	-28.901718,121.430964	26/06/1869
CampSite	lat/long	-28.9167	121.167	-28.916667,121.166667	26/06/1869
CampSite	lat/long	-28.9017	121.431	-28.916667,121.166667	27/06/1869
CampSite	lat/long	-28.8553	121.45	-28.855278,121.45	28/06/1869
CampSite	?	-28.8502	121.944	-28.850228,121.944179	29/06/1869
Mount Margaret	Mount Margaret	-28.8314	122.191	-28.83139,122.1906	30/06/1869
CampSite	lat/long	-28.8333	122.183	-28.833333,122.183333	30/06/1869
Mount Weld	Mount Weld	-28.7717	122.44	-28.77173,122.4397	01/07/1869
CampSite	lat/long	-28.6833	122.617	-28.683333,122.616667	01/07/1869
the tree	lat/long	-28.6833	122.833	-28.683333,122.833333	02/07/1869
Windich Brook	Windich Brook	-28.8673	122.382	-28.86729,122.382	03/07/1869
Mount Margaret	Mount Margaret	-28.8314	122.191	-28.83139,122.1906	04/07/1869
Mount Malcolm	Mount Malcolm	-28.8887	121.458	-28.88869,121.4578	05/07/1869
campsite	lat/long	-28.9167	121.167	-28.916667,121.166667	05/07/1869
campsite	lat/long	-28.9167	121.167	-28.916667,121.166667	06/07/1869
campsite	lat/long	-28.95	120.917	-28.950000,120.916667	07/07/1869
Two Springs	Two Springs	-28.8811	120.514	-28.88111,120.5139	08/07/1869
campsite	lat/long	-28.8928	120.15	-28.892778,120.15	09/07/1869
Mount Alfred	Mount Alfred	-28.8554	119.992	-28.85537,119.9923	10/07/1869
CampSite	lat/long	-28.8833	119.833	-28.883333,119.833333	10/07/1869
CampSite	lat/long	-28.8833	119.833	-28.883333,119.833333	11/07/1869
CampSite	lat/long	-28.9633	119.467	-28.963333,119.466667	12/07/1869
campsite	?	-29.2611	119.604	-29.261075,119.603817	13/07/1869
Mount Elvire	Mount Elvire	-29.2579	119.637	-29.25788,119.6367	14/07/1869
campsite	?	-29.2054	119.413	-29.205448,119.413017	14/07/1869
campsite	?	-29.0642	119.267	-29.064167,119.266667	15/07/1869
Yeeramudder Hill	Yerramudder Hill	-29.0843	119.068	-29.08427,119.0684	16/07/1869
campsite	lat/long	-29.1464	118.983	-29.146389,118.983333	16/07/1869
campsite	?	-29.1203	118.569	-29.120278,118.569313	17/07/1869
Warne	Warne River	-29.3276	118.05	-29.32762,118.0498	18/07/1869
campsite	?	-29.2097		-29.209691,118.451241	19/07/1869
Meroin	Meroin Rock	-29.1912	118.135	-29.19123,118.135	20/07/1869
campsite	lat/long	-29.1803	118.233	-29.180278,118.233333	20/07/1869
Pullagooroo	Pullagaroo Spring	-29.1021	117.803	-29.10206,117.8028	21/07/1869
Bunnaroo	lat/long	-28.9667	117.583	-28.966667,117.583333	22/07/1869
campsite	lat/long	-29.4092	117.333	-29.409167,117.333333	23/07/1869
Mount Singleton	Mount Singleton	-29.4662	117.299	-29.46624,117.2987	24/07/1869
campsite	lat/long	-29.4092	117.333	-29.409167,117.333333	24/07/1869
campsite	lat/long	-29.4092	117.333	-29.409167,117.333333	25/07/1869
campsite	?	-29.3633	116.985	-29.363333,116.985053	26/07/1869
Damparwar	Damperwah Spring	-29.2835	116.71	-29.28346,116.7101	27/07/1869
Lake Monger	Mongers Lake	-29.4857	116.692	-29.48569,116.6917	28/07/1869
Murrunggnulgo	?	-29.6222	116.683	-29.622222,116.683296	28/07/1869
Bera Bera	Bera Bera Rockhole	-30.0057	116.818	-30.00569,116.8178	29/07/1869
Wandanno	Wandanno Hill	-29.9974	116.726	-29.99736,116.7256	29/07/1869
Bera Bera	Bera Bera Rockhole	-30.0057	116.818	-30.00569,116.8178	29/07/1869
Gnookadunging	Gnookadunging Waterhole	-30.0987	116.518	-30.09875,116.5178	30/07/1869
Ginbinning	Ginbinning	-30.1321	116.518	-30.13209,116.5178	30/07/1869
Manginie	?	-30.35	116.42	-30.350000,116.420345	30/07/1869
Cooroo Springs	?	-30.524	116.337	-30.523984,116.337310	31/07/1869
Cooroo Springs	?	-30.524	116.337	-30.523984,116.337310	01/08/1869
Mr. Donald Macpherson's	?	-30.8695	116.325	-30.869547, 116.324598	02/08/1869
Badgy-Badgy	Badji Badji Brook ?	-30.9485	116.241	-30.94849,116.2406	02/08/1869
campsite	?	-31.3324	116.347	-31.332369,116.347225	03/08/1869
Newcastle	Newcastle Bridge	-31.5492	116.463	-31.54917,116.4625	04/08/1869
Baylup	Bailup	-31.7254	116.277	-31.72544,116.2773	05/08/1869
Guildford	Guildford	-31.8993	115.969	-31.89933,115.9687	06/08/1869
Perth	Perth	-31.9518	115.859	-31.95184,115.8587	06/08/1869
