# Supplementary material for: Exploring Historical Australian Expeditions with Time-Layered Cultural Maps
Source: MDPI journal article supplement (doi:10.3390/ijgi12030104), 2023-03-02
Supplement: s1 [file s1 › Table S2-GoogleSpreadsheet.xlsx]

## Sheet: Sheet1
Title	Location	StartDate	EndDate	Description	Web Page	Media	Media Caption	Media Credit	Tags	Place	Source
Day 1 - Day 3. Newcastle ()	-31.54917,116.4625	17/04/1869	19/04/1869	Sir, In pursuance of instructions received from you, the exploring party under my command consisted of the following persons, namely, Mr. George Monger, as second in command; Mr. Malcolm Hamersley, as third in command; probation prisoner, David Morgan, as shoeing smith, and two natives (Tommy Windich and Jemmy Mungaro). The latter native gave Mr. J.H. Monger the information respecting the murder …						Newcastle	Explorations in Australia - Chapter 2. FIRST EXPEDITION IN SEARCH OF LEICHARDT.
Day 3. Mombekine ()	-31.42376,116.6848	19/04/1869		Reached Mombekine, which is about sixteen miles East-North-East from Newcastle.						Mombekine	Explorations in Australia - Chapter 2. FIRST EXPEDITION IN SEARCH OF LEICHARDT.
Day 4. Goomalling ()	-31.29987,116.8312	20/04/1869		Continued journey to Goomalling, sixteen miles, which we reached at 1 p.m., and devoted the remainder of the afternoon to weighing and packing rations, etc., for a final start.						Goomalling	Explorations in Australia - Chapter 2. FIRST EXPEDITION IN SEARCH OF LEICHARDT.
Day 5. Walyamurra Lake (Walyormouring Lake)	-31.14904,116.8734	21/04/1869		Leaving Goomalling at 10.30 a.m., we travelled in a northerly direction for nine miles, and reached Walyamurra Lake; thence about East-North-East for seven miles, we encamped at a well on north side of Kombekine Lake. The water was very bad from opossums being drowned in it, and there was hardly any feed.						Walyamurra Lake	Explorations in Australia - Chapter 2. FIRST EXPEDITION IN SEARCH OF LEICHARDT.
Day 5. Kombekine Lake ()	-31.0832,116.9909	21/04/1869		thence about East-North-East for seven miles, we encamped at a well on north side of Kombekine Lake. The water was very bad from opossums being drowned in it, and there was hardly any feed.						Kombekine Lake	Explorations in Australia - Chapter 2. FIRST EXPEDITION IN SEARCH OF LEICHARDT.
Day 6. Naaning ()	-31.1807,117.1817	22/04/1869		Hearing from a number of natives that there was no water in the direction we intended steering, namely, to Mount Churchman, we decided on changing our course and proceed there via Waddowring, in latitude 31 degrees south and longitude 118 degrees east. Steering about South-South-East for eight miles, through dense scrubby thickets, which we had great difficulty in getting the cart through, we str…						Naaning	Explorations in Australia - Chapter 2. FIRST EXPEDITION IN SEARCH OF LEICHARDT.
Day 7. Pingeperring (Benjaberring)	-31.14361,117.2897	23/04/1869		Mr. George Roe (who had come from Northam to bid us farewell) and my teamster left us this morning to return to Newcastle. Considerable delay having occurred in collecting the horses, we did not start till twelve o'clock, when we steered East-North-East for eight miles over scrubby sand-plains, and camped at a well called Pingeperring, with very little feed for our horses.						Pingeperring	Explorations in Australia - Chapter 2. FIRST EXPEDITION IN SEARCH OF LEICHARDT.
Day 8. Dwartwollaking ()	-31.14764,117.5456	24/04/1869		Started at 8.50 a.m. and steered about east for seven miles over scrubby, undulating sand-plains, thence North 50 degrees East magnetic for two miles, thence North 160 degrees for one mile, and thence about North 80 degrees East magnetic for five miles over scrubby sand-plains. We camped at a spring called Dwartwollaking at 5 p.m. Barometer 29.45; thermometer 71 degrees.						Dwartwollaking	Explorations in Australia - Chapter 2. FIRST EXPEDITION IN SEARCH OF LEICHARDT.
Day 9. Dwartwollaking ()	-31.14764,117.5456	25/04/1869		Did not travel to-day. Took observations for time, and corrected our watches. Found camp to be in south latitude 31 degrees 10 minutes by meridian altitude of sun.						Dwartwollaking	Explorations in Australia - Chapter 2. FIRST EXPEDITION IN SEARCH OF LEICHARDT.
Day 10. Yarraging ()	-31.03958,117.9501	26/04/1869		Travelled in about the direction of North 73 degrees East magnetic for twenty-eight miles. We reached Yarraging, the farthest station to the eastward, belonging to Messrs. Ward and Adams, where we bivouacked for the night.						Yarraging	Explorations in Australia - Chapter 2. FIRST EXPEDITION IN SEARCH OF LEICHARDT.
Day 11. Waddowring (?)	-31.00,118.00	27/04/1869		Bought some rations from Ward and Co., making our supply equal to last three months on the daily allowance of a pound and a half of flour, half a pound of pork, a quarter of a pound of sugar, and half an ounce of tea per man. Being unable to take the cart any further, and wishing to have the team horses with me, I arranged with Ward and Co. to take it to Newcastle for 2 pounds. Packed up and left…						Waddowring	Explorations in Australia - Chapter 2. FIRST EXPEDITION IN SEARCH OF LEICHARDT.
Day 12. Cartubing ()	-30.81791,117.822	28/04/1869		Started this morning with Mr. Monger, Tommy Windich, and Dunbatch (a native of this locality) in search of water in order to shift the party. Travelling about north for eleven miles we found a native well, and by digging it out seven feet we obtained sufficient water for ourselves and horses. I therefore sent Mr. Monger back with instructions to bring the party to this spot, called Cartubing. I t…						Cartubing	Explorations in Australia - Chapter 2. FIRST EXPEDITION IN SEARCH OF LEICHARDT.
Day 12. Inkanyinning ()	-30.76263,117.847	28/04/1869		I then proceeded in a northerly direction, and at two miles passed water in granite rocks at a spot called Inkanyinning.						Inkanyinning	Explorations in Australia - Chapter 2. FIRST EXPEDITION IN SEARCH OF LEICHARDT.
Day 12. Yammaling ()	-30.6993,117.9062	28/04/1869		Shortly afterwards we passed another native well, called Yammaling, from which we steered towards a spot called Beebynyinning; but, night setting in, our guide lost his way, and we were obliged to camp for the night in a thicket without water and very little feed.						Yammaling	Explorations in Australia - Chapter 2. FIRST EXPEDITION IN SEARCH OF LEICHARDT.
Day 13. Beebynyinning (Beebeegnying Hills)	-30.63596,117.8656	29/04/1869		This morning Dunbatch brought us to Beebynyinning, where we obtained a little water by digging. After digging a well we returned to Cartubing, where we met the party and bivouacked on a patch of green feed.						Beebynyinning	Explorations in Australia - Chapter 2. FIRST EXPEDITION IN SEARCH OF LEICHARDT.
Day 13. Cartubing ()	-30.81791,117.822	29/04/1869		After digging a well we returned to Cartubing, where we met the party and bivouacked on a patch of green feed.						Cartubing	Explorations in Australia - Chapter 2. FIRST EXPEDITION IN SEARCH OF LEICHARDT.
Day 14. Inkanyinning ()	-30.76263,117.847	30/04/1869		Shifted the party from Cartubing to Beebynyinning, watering our horses on the way at Inkanyinning and Yammaling, which was fortunate, as there was very little water at Beebynyinning.						Inkanyinning	Explorations in Australia - Chapter 2. FIRST EXPEDITION IN SEARCH OF LEICHARDT.
Day 14. Yammaling ()	-30.6993,117.9062	30/04/1869		Shifted the party from Cartubing to Beebynyinning, watering our horses on the way at Inkanyinning and Yammaling, which was fortunate, as there was very little water at Beebynyinning.						Yammaling	Explorations in Australia - Chapter 2. FIRST EXPEDITION IN SEARCH OF LEICHARDT.
Day 14. Beebynyinning (Beebeegnying Hills)	-30.63596,117.8656	30/04/1869		Shifted the party from Cartubing to Beebynyinning, watering our horses on the way at Inkanyinning and Yammaling, which was fortunate, as there was very little water at Beebynyinning.						Beebynyinning
Day 15. Danjinning ()	-30.58735,118.034	01/05/1869		Steering about North-East for eight miles over grassy country, we reached and encamped at Danjinning, a small grassy spot, with native well, by deepening which about ten feet we obtained a plentiful supply of water. Mr. Austin visited Danjinning in 1854, and we could see the tracks of his horses distinctly. Barometer 29. Every appearance of rain, which we are in much want of.						Danjinning	Explorations in Australia - Chapter 2. FIRST EXPEDITION IN SEARCH OF LEICHARDT.
Day 16. Danjinning ()	-30.58735,118.034	02/05/1869		Rested at Danjinning, which I found to be in south latitude 30 degrees 34 minutes by meridian altitude of the sun. Read Divine Service. Jemmy shot six gnows and a wurrong to-day.						Danjinning	Explorations in Australia - Chapter 2. FIRST EXPEDITION IN SEARCH OF LEICHARDT.
Day 17. Yalburnunging ()	-30.26679,118.0584	03/05/1869		Steering in a northerly direction for sixteen miles, we reached Yalburnunging, a small grassy spot, with water in a native well, which we deepened four feet, and procured a plentiful supply. For the first nine miles our route lay over scrubby sand-plains, after which we came into dense thickets and stunted gums.						Yalburnunging	Explorations in Australia - Chapter 2. FIRST EXPEDITION IN SEARCH OF LEICHARDT.
Day 18. Gnaragnunging ()	-30.22068,117.9592	04/05/1869		Steering towards Mount Churchman, or Geelabbing, for about fifteen miles, we reached a grassy spot called Billeburring, and found water in a native well, probably permanent. At eight miles we passed a water-hole in some granite rocks, called Gnaragnunging. Dense acacia and cypress thickets most of the way.						Gnaragnunging	Explorations in Australia - Chapter 2. FIRST EXPEDITION IN SEARCH OF LEICHARDT.
Day 18. Billeburring ()	-30.17124,117.912	04/05/1869		Steering towards Mount Churchman, or Geelabbing, for about fifteen miles, we reached a grassy spot called Billeburring, and found water in a native well, probably permanent. At eight miles we passed a water-hole in some granite rocks, called Gnaragnunging. Dense acacia and cypress thickets most of the way.						Billeburring	Explorations in Australia - Chapter 2. FIRST EXPEDITION IN SEARCH OF LEICHARDT.
Day 19. Coolee (?)	-30.077740, 117.907944	05/05/1869		Steering in a northerly direction for about twelve miles, we reached Mount Churchman, or Geelabbing, an immense bare granite hill, and camped, with plenty of feed and water. At five miles passed a spring called Coolee. Country very dense and scrubby; no feed in any of the thickets. From the summit of Mount Churchman, Ningham of Mr. Monger, or Mount Singleton of Mr. A.C. Gregory, bore North 312 de…						Coolee	Explorations in Australia - Chapter 2. FIRST EXPEDITION IN SEARCH OF LEICHARDT.
Day 19. Mount Churchman ()	-29.92707,117.9078	05/05/1869		Steering in a northerly direction for about twelve miles, we reached Mount Churchman, or Geelabbing, an immense bare granite hill, and camped, with plenty of feed and water. At five miles passed a spring called Coolee. Country very dense and scrubby; no feed in any of the thickets. From the summit of Mount Churchman, Ningham of Mr. Monger, or Mount Singleton of Mr. A.C. Gregory, bore North 312 de…						Mount Churchman	Explorations in Australia - Chapter 2. FIRST EXPEDITION IN SEARCH OF LEICHARDT.
Day 20. Woodgine ()	-29.7904,117.8484	06/05/1869		Left Mount Churchman in company with the nine natives, and travelled about North-North-West for ten miles to a small water-hole called Woodgine, thence in a northerly direction to a branch of Lake Moore, which we crossed without difficulty, and, following along its north shore for three miles, we bivouacked at a spring close to the lake called Cundierring, with splendid feed around the granite ro…						Woodgine	Explorations in Australia - Chapter 2. FIRST EXPEDITION IN SEARCH OF LEICHARDT.
Day 20. Lake Moore (?)	-29.746195, 117.857973	06/05/1869		Left Mount Churchman in company with the nine natives, and travelled about North-North-West for ten miles to a small water-hole called Woodgine, thence in a northerly direction to a branch of Lake Moore, which we crossed without difficulty, and, following along its north shore for three miles, we bivouacked at a spring close to the lake called Cundierring, with splendid feed around the granite ro…						Lake Moore	Explorations in Australia - Chapter 2. FIRST EXPEDITION IN SEARCH OF LEICHARDT.
Day 20. Cundierring ()	-29.70151,117.8892	06/05/1869		Left Mount Churchman in company with the nine natives, and travelled about North-North-West for ten miles to a small water-hole called Woodgine, thence in a northerly direction to a branch of Lake Moore, which we crossed without difficulty, and, following along its north shore for three miles, we bivouacked at a spring close to the lake called Cundierring, with splendid feed around the granite ro…						Cundierring	Explorations in Australia - Chapter 2. FIRST EXPEDITION IN SEARCH OF LEICHARDT.
Day 21. Curroning (?)	-29.528634, 117.896849	07/05/1869		Steering in a northerly direction for eleven miles, through dense thickets of acacia and cypress, we reached some granite rocks with water on them, called Curroning, and bivouacked. Have fears that the information received from the natives relates to nine of Mr. Austin's horses that died from poison at Poison Rock. They now state they are only horses' bones, and not men's, as first stated.						Curroning	Explorations in Australia - Chapter 2. FIRST EXPEDITION IN SEARCH OF LEICHARDT.
Day 22. Yeergolling ()	-29.49567,117.9348	08/05/1869		Travelling in the direction of North 30 degrees East for about ten miles, we reached some granite rocks, with a water-hole in them, called Coorbedar. Passed over very rough, low, quartz hills, covered with acacia thickets, etc. At four miles passed a water-hole called Yeergolling; at seven miles a small one called Gnurra; and another at eight miles called Munnarra.						Yeergolling	Explorations in Australia - Chapter 2. FIRST EXPEDITION IN SEARCH OF LEICHARDT.
Day 22. Gnurra ()	-29.45623,117.9595	08/05/1869		Travelling in the direction of North 30 degrees East for about ten miles, we reached some granite rocks, with a water-hole in them, called Coorbedar. Passed over very rough, low, quartz hills, covered with acacia thickets, etc. At four miles passed a water-hole called Yeergolling; at seven miles a small one called Gnurra; and another at eight miles called Munnarra.						Gnurra	Explorations in Australia - Chapter 2. FIRST EXPEDITION IN SEARCH OF LEICHARDT.
Day 22. Munnarra ()	-29.44206,117.972	08/05/1869		Travelling in the direction of North 30 degrees East for about ten miles, we reached some granite rocks, with a water-hole in them, called Coorbedar. Passed over very rough, low, quartz hills, covered with acacia thickets, etc. At four miles passed a water-hole called Yeergolling; at seven miles a small one called Gnurra; and another at eight miles called Munnarra.						Munnarra	Explorations in Australia - Chapter 2. FIRST EXPEDITION IN SEARCH OF LEICHARDT.
Day 22. Coorbedar (?)	-29.425359,118.007555	08/05/1869		Travelling in the direction of North 30 degrees East for about ten miles, we reached some granite rocks, with a water-hole in them, called Coorbedar. Passed over very rough, low, quartz hills, covered with acacia thickets, etc. At four miles passed a water-hole called Yeergolling; at seven miles a small one called Gnurra; and another at eight miles called Munnarra.						Coorbedar	Explorations in Australia - Chapter 2. FIRST EXPEDITION IN SEARCH OF LEICHARDT.
Day 23. Dowgooroo ()	-29.4354,117.9809	09/05/1869		Rested our horses at Coorbedar. Found camp to be in south latitude 29 degrees 24 minutes 43 seconds by meridian altitudes of the sun and Regulus, and in longitude 118 degrees 6 minutes East. From a quartz hill half a mile South-West from Coorbedar, Mount Singleton bore North 268 degrees 15 minutes East. The supply of water from the rock having been used, I went, in company with Mr. Hamersley, to …						Dowgooroo	Explorations in Australia - Chapter 2. FIRST EXPEDITION IN SEARCH OF LEICHARDT.
Day 23. CampSite (?)	-29.411944,118.1	09/05/1869		Rested our horses at Coorbedar. Found camp to be in south latitude 29 degrees 24 minutes 43 seconds by meridian altitudes of the sun and Regulus, and in longitude 118 degrees 6 minutes East. From a quartz hill half a mile South-West from Coorbedar, Mount Singleton bore North 268 degrees 15 minutes East. The supply of water from the rock having been used, I went, in company with Mr. Hamersley, to …						CampSite	Explorations in Australia - Chapter 2. FIRST EXPEDITION IN SEARCH OF LEICHARDT.
Day 24. Warne River (?)	-29.347389, 118.195744	10/05/1869		Started this morning in company with Tommy Windich and a native boy (one of the nine who joined us at Mount Churchman) to examine the locality called Warne. Steering North 42 degrees East magnetic for about seven miles, we came to a grassy flat about half a mile wide, with a stream-bed trending south running through it. The natives state it to be dry in summer, but at present there is abundance o…						Warne River	Explorations in Australia - Chapter 2. FIRST EXPEDITION IN SEARCH OF LEICHARDT.
Day 25. CampSite (?)	-29.355722, 118.097998	10/05/1869		Started this morning in company with Tommy Windich and a native boy (one of the nine who joined us at Mount Churchman) to examine the locality called Warne. Steering North 42 degrees East magnetic for about seven miles, we came to a grassy flat about half a mile wide, with a stream-bed trending south running through it. The natives state it to be dry in summer, but at present there is abundance o…						CampSite	Explorations in Australia - Chapter 2. FIRST EXPEDITION IN SEARCH OF LEICHARDT.
Day 26. Dowgooroo ()	-29.4354,117.9809	11/05/1869		Returned this morning to Dowgooroo and found all well. Rain, which we were much in want of, fell lightly most of the day. Barometer 28.50; thermometer 61 degrees.						Dowgooroo	Explorations in Australia - Chapter 2. FIRST EXPEDITION IN SEARCH OF LEICHARDT.
Day 27. CampSite (?)	-29.355722, 118.097998	12/05/1869		Steered this morning about North 38 degrees East magnetic for eight miles, and camped by a shallow lake of fresh water--the bivouac of the 10th. Here we met a party of twenty-five natives (friends of my native Jemmy and the nine who joined us at Mount Churchman) who had a grand corroboree in honour of the expedition. They stated that at Bouincabbajilimar there were the remains of a number of hors…						CampSite	Explorations in Australia - Chapter 2. FIRST EXPEDITION IN SEARCH OF LEICHARDT.
Day 28. Durkying ()	-29.44928,118.2448	13/05/1869		Bidding farewell to all the natives, we steered in a south-easterly direction for fifteen miles, and camped in a rough hollow called Durkying; cypress and acacia thickets the whole way.						Durkying	Explorations in Australia - Chapter 2. FIRST EXPEDITION IN SEARCH OF LEICHARDT.
Day 29. Mingan ()	-29.6104,118.2667	14/05/1869		One of our horses having strayed, we did not start till 10.40 a.m., when we steered in about a South-East direction for eight miles, and camped on an elevated grassy spot, called Mingan, with water in the granite rocks, probably permanent. The thickets were a little less dense than usual, but without any grass, except at the spots mentioned. By meridian altitudes of Mars and Regulus, we were in s…						Mingan	Explorations in Australia - Chapter 2. FIRST EXPEDITION IN SEARCH OF LEICHARDT.
Day 30. Earroo (lat/long)	-29.384167,118.583333	15/05/1869		Steering North-East for four miles, and North-North-East for seven miles, over sandy soil, with thickets of acacia and cypress, we bivouacked on an elevated grassy spot, called Earroo, with water in granite rocks.						Earroo	Explorations in Australia - Chapter 2. FIRST EXPEDITION IN SEARCH OF LEICHARDT.
Day 31. Earroo (lat/long)	-29.384167,118.583333	16/05/1869		Rested at Earroo; horses enjoying good feed. By meridian altitudes of Regulus and Mars, camp at Earroo was in south latitude 29 degrees 23 minutes 3 seconds, and in longitude 118 degrees 35 minutes East; weather very cloudy; barometer 29.						Earroo	Explorations in Australia - Chapter 2. FIRST EXPEDITION IN SEARCH OF LEICHARDT.
Day 32. Croobenyer ()	-29.24983,118.7425	17/05/1869		Started 7.50 a.m., and steered North 60 degrees East for about five miles; thence about North 50 degrees East for eight miles; thence North 85 degrees East for five miles, to a small grassy spot called Croobenyer, with water in granite rocks. Sandy soil, thickets of cypress, acacia, etc., most of the way. Found camp to be in south latitude 29 degrees 12 minutes 43 seconds by meridian altitudes of…						Croobenyer	Explorations in Australia - Chapter 2. FIRST EXPEDITION IN SEARCH OF LEICHARDT.
Day 32. CampSite (?)	-29.211944,118.7425	17/05/1869		Started 7.50 a.m., and steered North 60 degrees East for about five miles; thence about North 50 degrees East for eight miles; thence North 85 degrees East for five miles, to a small grassy spot called Croobenyer, with water in granite rocks. Sandy soil, thickets of cypress, acacia, etc., most of the way. Found camp to be in south latitude 29 degrees 12 minutes 43 seconds by meridian altitudes of…						CampSite	Explorations in Australia - Chapter 2. FIRST EXPEDITION IN SEARCH OF LEICHARDT.
Day 33. Yeeramudder ()	-29.08427,119.0684	18/05/1869		Steering North 70 degrees East for two miles and a half, we saw a low hill called Yeeramudder, bearing North 62 degrees 30 minutes East magnetic, distant about seventeen miles, for which we steered, and camped to the north of it, on a fine patch of grass with a little rain-water on some granite rocks. At eleven miles crossed a branch of a dry salt lake, which appears to run far to the eastward.						Yeeramudder	Explorations in Australia - Chapter 2. FIRST EXPEDITION IN SEARCH OF LEICHARDT.
Day 34. island (?)	-29.075531,119.315180	19/05/1869		Steering about North 85 degrees East magnetic for fourteen miles, attempted to cross the lake we had been leaving a little to the southward, making for a spot supposed by us to be the opposite shore, but on arriving at which was found to be an island. As we had great difficulty in reaching it, having to carry all the loads the last 200 yards, our horses saving themselves with difficulty, and, bei…						island	Explorations in Australia - Chapter 2. FIRST EXPEDITION IN SEARCH OF LEICHARDT.
Day 34. CampSite (?)	-29.078345,119.345118	19/05/1869		Steering about North 85 degrees East magnetic for fourteen miles, attempted to cross the lake we had been leaving a little to the southward, making for a spot supposed by us to be the opposite shore, but on arriving at which was found to be an island. As we had great difficulty in reaching it, having to carry all the loads the last 200 yards, our horses saving themselves with difficulty, and, bei…						CampSite	Explorations in Australia - Chapter 2. FIRST EXPEDITION IN SEARCH OF LEICHARDT.
Day 35. CampSite (?)	-29.064167,119.266667	20/05/1869		On examining this immense lake I found that it was impossible to get the horses and loads across it; I was therefore compelled to retrace my steps to where we first entered it, which the horses did with great difficulty without their loads. I was very fortunate in finding water and feed about three miles North-North-West, to which we took the horses and bivouacked, leaving on the island all the l…						CampSite	Explorations in Australia - Chapter 2. FIRST EXPEDITION IN SEARCH OF LEICHARDT.
Day 36. mainland (?)	-28.996274,119.432029	21/05/1869		Went over to the lake in company with Messrs. Monger, Hamersley, and Tommy Windich, with four horses. Succeeded in getting all the loads to the mainland, carrying them about three quarters of a mile up to our knees in mud, from which point the lake became a little firmer, and the horses carried the loads out. I cannot speak too highly of the manner in which my companions assisted me on this tryin…					HEAVY WORK IN THE BOG.	mainland	Explorations in Australia - Chapter 2. FIRST EXPEDITION IN SEARCH OF LEICHARDT.
Day 37. CampSite (?)	-29.064167,119.266667	22/05/1869		Went over to the lake with all the horses, and brought the loads to the camp. Started Tommy and Jemmy in search of the natives. After returning to camp, overhauled all the pack bags, and dried and re-packed them, ready for a fresh start on Monday morning. Also washed the mud off the horses, who appear to be doing well, and fast recovering from the effects of the bogging. Tommy and Jemmy returned …					HEAVY WORK IN THE BOG.	CampSite	Explorations in Australia - Chapter 2. FIRST EXPEDITION IN SEARCH OF LEICHARDT.
Day 38. Retreat Rock ()	-29.06066,119.2509	23/05/1869		Went with Tommy Windich and Jemmy on foot to follow the tracks of the natives seen yesterday. Seeing no chance of overtaking them, as they appeared to be making off at a great rate, and were twelve hours in advance of us, we returned, after following the tracks for five miles across the lake. The camp was reached at 2 p.m., after we had walked about fifteen miles. This spot, which I named Retreat…					HEAVY WORK IN THE BOG.	Retreat Rock	Explorations in Australia - Chapter 2. FIRST EXPEDITION IN SEARCH OF LEICHARDT.
Day 39. CampSite (?)	-28.969489,119.494951	24/05/1869		Some of the horses having strayed, we were not able to start till 10.40 a.m., when we steered in about East-North-East direction for sixteen miles, and camped on a piece of rising ground, with very little water. From this bivouac, a very remarkable peaked hill, called Woolling, which I named Mount Elain, bore North 162 degrees 15 minutes East magnetic, distant about twenty miles; and two conspicu…					HEAVY WORK IN THE BOG.	CampSite	Explorations in Australia - Chapter 2. FIRST EXPEDITION IN SEARCH OF LEICHARDT.
Day 40. Yeadie ()	-29.00982,119.632	25/05/1869		Steering for Yeadie and Bulgar for five miles, and came to some granite rocks with water, where we gave drink to our thirsty horses. Leaving the party to follow, I went with Jemmy in advance to look for water, which we found in a rough stream-bed, and brought the party to it. This afternoon went with Jemmy to the summit of Yeadie, and took a round of angles. The local attraction was so great on t…					DISCOVERY OF LAKE BARLEE.	Yeadie	Explorations in Australia - Chapter 2. FIRST EXPEDITION IN SEARCH OF LEICHARDT.
Day 40. CampSite (lat/long)	-28.980556,119.65	25/05/1869		Steering for Yeadie and Bulgar for five miles, and came to some granite rocks with water, where we gave drink to our thirsty horses. Leaving the party to follow, I went with Jemmy in advance to look for water, which we found in a rough stream-bed, and brought the party to it. This afternoon went with Jemmy to the summit of Yeadie, and took a round of angles. The local attraction was so great on t…					DISCOVERY OF LAKE BARLEE.	CampSite	Explorations in Australia - Chapter 2. FIRST EXPEDITION IN SEARCH OF LEICHARDT.
Day 41. CampSite (?)	-28.863785,119.826478	26/05/1869		Moving in about a northerly direction for nine miles, we turned to the eastward, rounded a branch of Lake Barlee, towards some loose granite rocks, where we encamped, but could not find water. Sent Jemmy over to another rock one mile southward, where he found a fine permanent water-hole, to which we took the horses after dark. Distance travelled to-day about eighteen miles. Tommy shot a fine emu,…					DISCOVERY OF LAKE BARLEE.	CampSite	Explorations in Australia - Chapter 2. FIRST EXPEDITION IN SEARCH OF LEICHARDT.
Day 42. CampSite (lat/long)	-28.883333,119.833333	27/05/1869		Shifted the party over to the water found last night, one mile distant, and camped. Found camp to be in south latitude 28 degrees 53 minutes, and in longitude about 119 degrees 50 minutes east. Marked a small tree with the letter F. close to the waterhole.					DISCOVERY OF LAKE BARLEE.	CampSite	Explorations in Australia - Chapter 2. FIRST EXPEDITION IN SEARCH OF LEICHARDT.
Day 43. CampSite (lat/long)	-28.892778,120.15	28/05/1869		Some of the horses having strayed, we did not start till 9.30 a.m., when I went in advance of the party, in company with Jemmy, to look for water. After following Lake Barlee for nine miles, it turned to the southward. Then scouring the country in every direction for water without success, we reached the tracks of the party (who had passed on), and, following them over plains of spinifex and stun…					DISCOVERY OF LAKE BARLEE.	CampSite	Explorations in Australia - Chapter 2. FIRST EXPEDITION IN SEARCH OF LEICHARDT.
Day 44. Mount Alexander ()	-28.92564,120.2706	29/05/1869		Started in company with Tommy and Jemmy to explore the country eastward, leaving the party to take off the horses' shoes for their relief. Travelling in an easterly direction for eight miles over sandy soil and spinifex, we reached the summit of a high hill, supposed by Jemmy to be Noondie, which I named Mount Alexander, from which we saw another range about eleven miles distant, bearing North 82…					DISAPPOINTED EXPEDITIONS.	Mount Alexander	Explorations in Australia - Chapter 2. FIRST EXPEDITION IN SEARCH OF LEICHARDT.
Day 44. CampSite (?)	-28.862500,120.500000	29/05/1869		Started in company with Tommy and Jemmy to explore the country eastward, leaving the party to take off the horses' shoes for their relief. Travelling in an easterly direction for eight miles over sandy soil and spinifex, we reached the summit of a high hill, supposed by Jemmy to be Noondie, which I named Mount Alexander, from which we saw another range about eleven miles distant, bearing North 82…					DISAPPOINTED EXPEDITIONS.	CampSite
Day 45. CampSite (lat/long)	-28.892778,120.15	30/05/1869		Started at dawn, with the saddles and rugs on our backs, in search of the horses, and, after travelling a mile and a half on their tracks, found them at a small water-hole passed by us yesterday. Saddled up and reached camp at eleven o'clock, and found all well. Yesterday morning the dogs caught an emu, off which we made a first-rate breakfast, not having had anything to eat since the previous mo…					DISAPPOINTED EXPEDITIONS.	CampSite	Explorations in Australia - Chapter 2. FIRST EXPEDITION IN SEARCH OF LEICHARDT.
Day 46. Mount Bivou (Mount Bevon)	-29.04398,120.3117	31/05/1869		Started this morning in company with Mr. Monger and Jemmy in search of natives, leaving Mr. Hamersley in charge, with instructions to proceed eastward about twenty-two miles, to where I found water on the 29th. After starting the party we steered in a South-South-East direction towards a high range of hills, which I named Mount Bivou, about twelve miles distant. To the westward of the range we fo…					A DIFFICULTY WITH THE NATIVES.	Mount Bivou	Explorations in Australia - Chapter 2. FIRST EXPEDITION IN SEARCH OF LEICHARDT.
Day 46. Native Camp (?)	-29.121401,120.144845	31/05/1869		Started this morning in company with Mr. Monger and Jemmy in search of natives, leaving Mr. Hamersley in charge, with instructions to proceed eastward about twenty-two miles, to where I found water on the 29th. After starting the party we steered in a South-South-East direction towards a high range of hills, which I named Mount Bivou, about twelve miles distant. To the westward of the range we fo…					A DIFFICULTY WITH THE NATIVES.	Native Camp
Day 46. CampSite (?)	-29.121351,120.225151	31/05/1869		Started this morning in company with Mr. Monger and Jemmy in search of natives, leaving Mr. Hamersley in charge, with instructions to proceed eastward about twenty-two miles, to where I found water on the 29th. After starting the party we steered in a South-South-East direction towards a high range of hills, which I named Mount Bivou, about twelve miles distant. To the westward of the range we fo…					A DIFFICULTY WITH THE NATIVES.	CampSite
Day 47. CampSite (lat/long)	-28.862500,120.500000	01/06/1869		At daybreak saddled up our tired and hungry horses, and proceeded to where we had dinner yesterday. After giving our horses two hours' grazing and having had breakfast, started back towards the natives' camp, as I wished to question them respecting the reported death of white men in this neighbourhood. When we approached the natives' bivouac, we saw where they had been following up our tracks in …					A DIFFICULTY WITH THE NATIVES.	CampSite	Explorations in Australia - Chapter 2. FIRST EXPEDITION IN SEARCH OF LEICHARDT.
Day 48. Two-spring (Two Springs)	-28.88111,120.5139	02/06/1869		Rested our horses at the place, which I called the Two-spring Bivouac, there being two small springs here. Re-stuffed with grass all the pack-saddles, as some of the horses were getting sore backs. By meridian altitude of sun found the camp to be in south latitude 28 degrees 51 minutes 45 seconds, and in longitude about 120 degrees 30 minutes east. I was very much annoyed at the natives not putti…					BIVOUACKING.	Two-spring	Explorations in Australia - Chapter 2. FIRST EXPEDITION IN SEARCH OF LEICHARDT.
Day 49. CampSite (?)	-28.792575,120.267093	03/06/1869		No sign of the natives this morning. I decided to steer in the direction pointed out by them, and travelling about North 306 degrees East magnetic for fifteen miles, we found water in some granite rocks, with very good feed around, cypress and acacia thickets, light red loamy soil, destitute of grass.					BIVOUACKING.	CampSite	Explorations in Australia - Chapter 2. FIRST EXPEDITION IN SEARCH OF LEICHARDT.
Day 50. CampSite (?)	-28.712838,120.024299	04/06/1869		Steering in about West-North-West direction for sixteen miles, the first six of which were studded with granite rocks, good feed around them, after which through poor sandy country, covered with spinifex. We bivouacked in a thicket without water or feed, and tied up our horses. Saw a natives' fire, but was unable to get near it. Barometer 28.52; fine.					BIVOUACKING.	CampSite	Explorations in Australia - Chapter 2. FIRST EXPEDITION IN SEARCH OF LEICHARDT.
Day 51. Depot Spring ()	-28.61314,120.1623	05/06/1869		After travelling in a northerly direction for seven miles without finding water, and without seeing any hill answering the description given by Jemmy, I struck about east for sixteen miles, and camped at a fine spring near some granite rocks, with splendid feed around them. This is the first good spring since leaving the settled districts. At 8 p.m., barometer 28.44; thermometer 72 degrees.					BIVOUACKING.	Depot Spring	Explorations in Australia - Chapter 2. FIRST EXPEDITION IN SEARCH OF LEICHARDT.
Day 52. Depot Spring ()	-28.61314,120.1623	06/06/1869		Rested at camp, which I called Depot Spring, and found to be in south latitude 28 degrees 36 minutes 34 seconds by meridian altitude of sun. Barometer at 8 a.m. 28.38; thermometer 57 degrees; at 5 p.m., barometer 28.30; thermometer 77 degrees.					BIVOUACKING.	Depot Spring	Explorations in Australia - Chapter 2. FIRST EXPEDITION IN SEARCH OF LEICHARDT.
Day 53. Mount Holmes ()	-28.23425,119.9773	07/06/1869		Started this morning, in company with Mr. Hamersley and Jemmy, to explore the country to the northward, where we had seen a peaked hill. Went in that direction about thirty miles, the first twenty of which were studded with granite rocks, with fine feed around them. At twenty-seven miles crossed a salt marsh, about one mile wide, and, continuing three miles farther, reached the peaked hill, which…					BIVOUACKING.	Mount Holmes	Explorations in Australia - Chapter 2. FIRST EXPEDITION IN SEARCH OF LEICHARDT.
Day 54. Mount Holmes ()	-28.23425,119.9773	08/06/1869		This morning, after saddling up, we ascended the conical hill (which I named Mount Holmes) and took a round of angles from it, after which we struck North 81 degrees East magnetic to a granite range about eight miles distant, where we found two fine water-holes, and rested an hour. Thence in about a South-South-East direction for twelve miles, we bivouacked without water on a small patch of feed.…					BIVOUACKING.	Mount Holmes	Explorations in Australia - Chapter 2. FIRST EXPEDITION IN SEARCH OF LEICHARDT.
Day 54. CampSite (?)	-28.378426,120.183152	08/06/1869		This morning, after saddling up, we ascended the conical hill (which I named Mount Holmes) and took a round of angles from it, after which we struck North 81 degrees East magnetic to a granite range about eight miles distant, where we found two fine water-holes, and rested an hour. Thence in about a South-South-East direction for twelve miles, we bivouacked without water on a small patch of feed.…					BIVOUACKING.	CampSite
Day 55. CampSite (?)	-28.689090,120.150857	09/06/1869		At daybreak, no sound of horses' bells, and anticipating they had made off in search of water, we put our saddles, guns, and rugs on our backs, and started on their tracks. After following the tracks for nine miles we came to a water-hole and had breakfast; afterwards we succeeded in overtaking the horses in a grassy flat, about thirteen miles South-South-East from our last night's bivouac. The l…					BIVOUACKING.	CampSite	Explorations in Australia - Chapter 2. FIRST EXPEDITION IN SEARCH OF LEICHARDT.
Day 56. CampSite (?)	-28.524133,120.406059	10/06/1869		Started again this morning in company with Mr. Monger and Jemmy, to explore the country to the eastward, leaving Mr. Hamersley to shift the party to our bivouac of the 2nd instant, about twenty-four miles South-East from here. After travelling East-North-East for six miles, we came upon a very old native at a fire in the thicket. Jemmy could not understand what he said, but he thought that he mea…					AN OLD NATIVE.	CampSite	Explorations in Australia - Chapter 2. FIRST EXPEDITION IN SEARCH OF LEICHARDT.
Day 57. Two Springs (lat/long)	-28.88111,120.5139	11/06/1869		Started at sunrise, and steered about East-North-East over lightly-grassed country; and on our way came upon a middle-aged native with two small children. We were within twenty yards of him before he saw us. He appeared very frightened, and trembled from head to foot. Jemmy could understand this native a little, and ascertained from him that he had never seen or heard anything about white men or …					AN OLD NATIVE.	Two Springs	Explorations in Australia - Chapter 2. FIRST EXPEDITION IN SEARCH OF LEICHARDT.
Day 58. Two Springs ()	-28.88111,120.5139	12/06/1869		Explored the country around camp in search of a better place for feed, but could not find water. Mr. Hamersley and party joined us at 4 p.m., all well. Tommy shot a red kangaroo, which was a great treat, after living so long on salt pork. Barometer 28.60; fine; cold wind from the east all day.					AN OLD NATIVE.	Two Springs	Explorations in Australia - Chapter 2. FIRST EXPEDITION IN SEARCH OF LEICHARDT.
Day 59. Two Springs ()	-28.88111,120.5139	13/06/1869		Rested at camp. Intend taking a trip to the southward to-morrow. Barometer 28.76.					AN OLD NATIVE.	Two Springs	Explorations in Australia - Chapter 2. FIRST EXPEDITION IN SEARCH OF LEICHARDT.
Day 60. CampSite (?)	-29.121351,120.225151	14/06/1869		Started this morning, in company with Morgan and Jemmy, to examine the country to the southward. Travelled in a south-westerly direction for twenty-five miles, and camped at the spot where we had the encounter with the natives on May 31. We found they had left, and there was no water on the rocks. Luckily our horses had water six miles back.					AN OLD NATIVE.	CampSite	Explorations in Australia - Chapter 2. FIRST EXPEDITION IN SEARCH OF LEICHARDT.
Day 61. Mount Ida ()	-29.2287,120.4025	15/06/1869		Saddled up at daybreak, and steered about South-East towards a high range of hills about ten miles distant. I named it Mount Ida, and from the summit I took a round of angles with my pocket sextant. On all the hills in this neighbourhood the local attraction is so great that the prismatic compass is useless. Found a fine spring of water on south side of Mount Ida, in an almost inaccessible spot. …					MOUNT IDA.	Mount Ida	Explorations in Australia - Chapter 2. FIRST EXPEDITION IN SEARCH OF LEICHARDT.
Day 61. CampSite (?)	-29.328204,120.401667	15/06/1869		Saddled up at daybreak, and steered about South-East towards a high range of hills about ten miles distant. I named it Mount Ida, and from the summit I took a round of angles with my pocket sextant. On all the hills in this neighbourhood the local attraction is so great that the prismatic compass is useless. Found a fine spring of water on south side of Mount Ida, in an almost inaccessible spot. …					MOUNT IDA.	CampSite	Explorations in Australia - Chapter 2. FIRST EXPEDITION IN SEARCH OF LEICHARDT.
Day 62. CampSite (?)	-29.133529,120.488615	16/06/1869		Saddled up at sunrise, and steered to some trap ranges, North 124 degrees East, about seven miles distant, from which I could see an immense lake running as far as the eye could reach to the eastward, and westerly and northerly, most probably joining Lake Barlee. Not being able to proceed farther southward, on account of the lake, I steered in a northerly direction for twenty miles, but, discover…					MOUNT IDA.	CampSite	Explorations in Australia - Chapter 2. FIRST EXPEDITION IN SEARCH OF LEICHARDT.
Day 63. Two Springs ()	-28.88111,120.5139	17/06/1869		At dawn, found that my horse Sugar, after breaking his bridle, had made off towards our bivouac of the 15th. Placing my saddle on Jemmy's horse, we followed on the track for six miles, when we came to a few granite rocks, with a little water on them, from rain that had fallen during the night. At this place Morgan was left with the horses and our guns, while Jemmy and I followed on Sugar's tracks…					MOUNT IDA.	Two Springs	Explorations in Australia - Chapter 2. FIRST EXPEDITION IN SEARCH OF LEICHARDT.
Day 64. CampSite (?)	-28.851781,120.736079	18/06/1869		Having thus made an exhaustive search in the neighbourhood where Jemmy expected to find the remains of the white men, by travelling over nearly the whole of the country between latitude 28 degrees and 29 degrees 30 minutes south, and longitude 120 and 121 degrees east, I determined to make the most of the little time at my disposal, and carry out the instruction that I was to attempt to proceed a…					EXPLORING EASTWARD.	CampSite	Explorations in Australia - Chapter 2. FIRST EXPEDITION IN SEARCH OF LEICHARDT.
Day 65. CampSite (?)	-28.95,120.916667	19/06/1869		The horses having strayed back on our tracks, we did not start till 12 o'clock, when the journey was continued towards the granite range seen yesterday, about ten miles distant. We camped on west side of North, with plenty of water from the recent rain on the granite rocks, but with very little feed. At five miles crossed a dry stream-bed, eighteen yards wide, sandy bottom; thickets most of the w…					EXPLORING EASTWARD.	CampSite	Explorations in Australia - Chapter 2. FIRST EXPEDITION IN SEARCH OF LEICHARDT.
Day 66. CampSite (?)	-28.95,120.916667	20/06/1869		Rested at camp. Jemmy shot four rock kangaroos to-day. Took a round of angles from a bare granite hill, North 50 degrees East magnetic, about one mile from camp, which I found to be in south latitude 28 degrees 57 minutes by meridian altitudes of Bootes (Arcturus) and a Pegasi (Markab); and in longitude about 120 degrees 55 minutes East. Saw a high hill bearing North 81 degrees 30 minutes East ma…					EXPLORING EASTWARD.	CampSite	Explorations in Australia - Chapter 2. FIRST EXPEDITION IN SEARCH OF LEICHARDT.
Day 67. CampSite (lat/long)	-28.883333,121.333333	21/06/1869		Steering towards Mount Lenora over some tolerably grassy country, we reached it at sundown, and, not finding any water, camped without it, with very good feed. In south latitude 28 degrees 53 minutes by meridian altitudes of Lyrae (Vega) and Aquilae (Altair), and in longitude about 121 degrees 20 minutes East.					EXPLORING EASTWARD.	CampSite	Explorations in Australia - Chapter 2. FIRST EXPEDITION IN SEARCH OF LEICHARDT.
Day 68. CampSite (lat/long)	-28.916667,121.166667	22/06/1869		After making every search in the vicinity of the bivouac for water, and the country ahead appearing very unpromising, I decided to return ten miles on our tracks, where we found a fine pool of water in a brook, and camped. Tomorrow I intend taking a flying trip in search of water.					EXPLORING EASTWARD.	CampSite	Explorations in Australia - Chapter 2. FIRST EXPEDITION IN SEARCH OF LEICHARDT.
Day 69. Mount Lenora ()	-28.90591,121.3373	23/06/1869		Started this morning, in company with Tommy Windich, to explore the country to the eastward for water, etc. After travelling three miles towards Mount Lenora, saw a natives' fire bearing North-East about three miles, to which we proceeded, and surprised a middle-aged native. Upon seeing us he ran off shouting, and decamped with a number of his companions, who were at a little distance. The horse …					A NATIVE UP A TREE.	Mount Lenora	Explorations in Australia - Chapter 2. FIRST EXPEDITION IN SEARCH OF LEICHARDT.
Day 69. Mount Malcolm ()	-28.88869,121.4578	23/06/1869		Started this morning, in company with Tommy Windich, to explore the country to the eastward for water, etc. After travelling three miles towards Mount Lenora, saw a natives' fire bearing North-East about three miles, to which we proceeded, and surprised a middle-aged native. Upon seeing us he ran off shouting, and decamped with a number of his companions, who were at a little distance. The horse …					A NATIVE UP A TREE.	Mount Malcolm	Explorations in Australia - Chapter 2. FIRST EXPEDITION IN SEARCH OF LEICHARDT.
Day 69. CampSite (?)	-28.852024,121.547751	23/06/1869		Started this morning, in company with Tommy Windich, to explore the country to the eastward for water, etc. After travelling three miles towards Mount Lenora, saw a natives' fire bearing North-East about three miles, to which we proceeded, and surprised a middle-aged native. Upon seeing us he ran off shouting, and decamped with a number of his companions, who were at a little distance. The horse …					A NATIVE UP A TREE.	CampSite	Explorations in Australia - Chapter 2. FIRST EXPEDITION IN SEARCH OF LEICHARDT.
Day 70. Mount Flora ()	-28.751074,121.800098	24/06/1869		Started early this morning, and steered East-North-East for six miles to some low stony ranges, lightly grassed; thence North 61 degrees 30 minutes East magnetic to the remarkable peak, which I named Mount Flora, distant about nine miles from the stony ranges, ascending which, I obtained a round of bearings and angles. Saw a high range bearing about North 106 degrees 15 minutes East magnetic, app…					A NATIVE UP A TREE.	Mount Flora	Explorations in Australia - Chapter 2. FIRST EXPEDITION IN SEARCH OF LEICHARDT.
Day 70. CampSite (?)	-28.826330,122.106272	24/06/1869		Started early this morning, and steered East-North-East for six miles to some low stony ranges, lightly grassed; thence North 61 degrees 30 minutes East magnetic to the remarkable peak, which I named Mount Flora, distant about nine miles from the stony ranges, ascending which, I obtained a round of bearings and angles. Saw a high range bearing about North 106 degrees 15 minutes East magnetic, app…					A NATIVE UP A TREE.	CampSite	Explorations in Australia - Chapter 2. FIRST EXPEDITION IN SEARCH OF LEICHARDT.
Day 71. Mount Margaret ()	-28.83139,122.1906	25/06/1869		Saddled at dawn, and proceeded to the range, which bore North 93 degrees 30 minutes East magnetic, about five miles distant, on reaching which I ascended the highest peak, and named it Mount Margaret. Took a round of angles and bearings. From the summit of Mount Margaret the view was very extensive. There was a large dry salt lake to the southward, as far as the eye could reach, while to the east…					MOUNT MARGARET.	Mount Margaret	Explorations in Australia - Chapter 2. FIRST EXPEDITION IN SEARCH OF LEICHARDT.
Day 71. Mount Flora ()	-28.7434,121.8073	25/06/1869		Saddled at dawn, and proceeded to the range, which bore North 93 degrees 30 minutes East magnetic, about five miles distant, on reaching which I ascended the highest peak, and named it Mount Margaret. Took a round of angles and bearings. From the summit of Mount Margaret the view was very extensive. There was a large dry salt lake to the southward, as far as the eye could reach, while to the east…					MOUNT MARGARET.	Mount Flora	Explorations in Australia - Chapter 2. FIRST EXPEDITION IN SEARCH OF LEICHARDT.
Day 71. CampSite (?)	-28.788133,121.648675	25/06/1869		Saddled at dawn, and proceeded to the range, which bore North 93 degrees 30 minutes East magnetic, about five miles distant, on reaching which I ascended the highest peak, and named it Mount Margaret. Took a round of angles and bearings. From the summit of Mount Margaret the view was very extensive. There was a large dry salt lake to the southward, as far as the eye could reach, while to the east…					MOUNT MARGARET.	CampSite	Explorations in Australia - Chapter 2. FIRST EXPEDITION IN SEARCH OF LEICHARDT.
Day 72. bivouac of the 23rd ()	-28.852024,121.547751	26/06/1869		Started at dawn, and reached our bivouac of the 23rd. There obtained just sufficient water for ourselves and the horses. Continuing, we found a fine pool of rain-water in a brook a mile and a half west of Mount Malcolm, and, reaching camp an hour after dark, found all well. On our way Tommy Windich shot a red kangaroo, which we carried to camp.					MOUNT MARGARET.	bivouac of the 23rd	Explorations in Australia - Chapter 2. FIRST EXPEDITION IN SEARCH OF LEICHARDT.
Day 72. a pool (?)	-28.901718,121.430964	26/06/1869		Started at dawn, and reached our bivouac of the 23rd. There obtained just sufficient water for ourselves and the horses. Continuing, we found a fine pool of rain-water in a brook a mile and a half west of Mount Malcolm, and, reaching camp an hour after dark, found all well. On our way Tommy Windich shot a red kangaroo, which we carried to camp.					MOUNT MARGARET.	a pool	Explorations in Australia - Chapter 2. FIRST EXPEDITION IN SEARCH OF LEICHARDT.
Day 72. CampSite (lat/long)	-28.916667,121.166667	26/06/1869		Started at dawn, and reached our bivouac of the 23rd. There obtained just sufficient water for ourselves and the horses. Continuing, we found a fine pool of rain-water in a brook a mile and a half west of Mount Malcolm, and, reaching camp an hour after dark, found all well. On our way Tommy Windich shot a red kangaroo, which we carried to camp.					MOUNT MARGARET.	CampSite	Explorations in Australia - Chapter 2. FIRST EXPEDITION IN SEARCH OF LEICHARDT.
Day 73. CampSite (?)	-28.916667,121.166667	27/06/1869		Rested at camp. Found it to be in south latitude 28 degrees 55 minutes by meridian altitudes of sun, Aquilae (Altair), and Lyra, and in longitude about 121 degrees 10 minutes East. Although we had great difficulty in procuring water in our last trip, I was reluctant to return without making another effort, especially as, from the appearance of the country east of the farthest point, I had hope of…					MOUNT MARGARET.	CampSite	Explorations in Australia - Chapter 2. FIRST EXPEDITION IN SEARCH OF LEICHARDT.
Day 74. CampSite (lat/long)	-28.855278,121.45	28/06/1869		Steering about North 81 degrees East magnetic, over lightly-grassed country, thinly wooded for sixteen miles, we camped a mile and a half west of Mount Malcolm, in south latitude 28 degrees 51 minutes 19 seconds by meridian altitude of Aquilae (Altair), and in longitude about 121 degrees 27 minutes East.					MOUNT MARGARET.	CampSite	Explorations in Australia - Chapter 2. FIRST EXPEDITION IN SEARCH OF LEICHARDT.
Day 75. CampSite (?)	-28.850228,121.944179	29/06/1869		Started this morning, in company with Tommy Windich, with seven days' provisions, leaving instructions for Mr. Monger to shift the party back to our last camp, where the feed was much better, in latitude 28 degrees 55 minutes South, and longitude 121 degrees 10 minutes East. Travelled about east for thirty miles towards Mount Margaret, our farthest point last trip. We camped in a thicket, without…					MOUNT MARGARET.	CampSite	Explorations in Australia - Chapter 2. FIRST EXPEDITION IN SEARCH OF LEICHARDT.
Day 76. Mount Margaret ()	-28.83139,122.1906	30/06/1869		Saddled up at dawn, and proceeded towards Mount Margaret, obtaining a little water at the spot where we found water on our former trip. Continuing, we came to a fine pool of water in a brook, and rested an hour, Mount Margaret being north-east about two miles and a half. Hardly any feed near the water. Resuming, we passed Mount Margaret and started towards the table hill seen previously, bearing …					MOUNT MARGARET.	Mount Margaret	Explorations in Australia - Chapter 2. FIRST EXPEDITION IN SEARCH OF LEICHARDT.
Day 76. CampSite (lat/long)	-28.833333,122.183333	30/06/1869		Saddled up at dawn, and proceeded towards Mount Margaret, obtaining a little water at the spot where we found water on our former trip. Continuing, we came to a fine pool of water in a brook, and rested an hour, Mount Margaret being north-east about two miles and a half. Hardly any feed near the water. Resuming, we passed Mount Margaret and started towards the table hill seen previously, bearing …					MOUNT MARGARET.	CampSite	Explorations in Australia - Chapter 2. FIRST EXPEDITION IN SEARCH OF LEICHARDT.
Day 77. Mount Weld ()	-28.77173,122.4397	01/07/1869		After journeying towards the table hill seen yesterday for six miles, crossed a large brook heading south-west, in which we found a small pool of rain-water, and rested an hour to breakfast. Resuming for about six miles, reached the table hill, which I ascended and took a round of angles. I have since named this hill Mount Weld, being the farthest hill seen eastward by us. Continuing about North …					MOUNT WELD.	Mount Weld	Explorations in Australia - Chapter 2. FIRST EXPEDITION IN SEARCH OF LEICHARDT.
Day 77. CampSite (lat/long)	-28.683333,122.616667	01/07/1869		After journeying towards the table hill seen yesterday for six miles, crossed a large brook heading south-west, in which we found a small pool of rain-water, and rested an hour to breakfast. Resuming for about six miles, reached the table hill, which I ascended and took a round of angles. I have since named this hill Mount Weld, being the farthest hill seen eastward by us. Continuing about North …					MOUNT WELD.	CampSite	Explorations in Australia - Chapter 2. FIRST EXPEDITION IN SEARCH OF LEICHARDT.
Day 78. the tree (lat/long)	-28.683333,122.833333	02/07/1869		Started at dawn, and steered about east, searching on our way for water, which our horses and ourselves were beginning to want much. At six miles we found a small hole in some rocks, apparently empty, but on sounding with a stick I found it to contain a little water. The mouth of the hole being too small to admit a pannican, and having used my hat with very little success, I at last thought of my…					MOUNT WELD.	the tree	Explorations in Australia - Chapter 2. FIRST EXPEDITION IN SEARCH OF LEICHARDT.
Day 79. Windich Brook ()	-28.86729,122.382	03/07/1869		Saddled up early, and steered westerly towards our last watering-place, about fourteen miles distant; but, after travelling nearly seven miles, came to a small pool of water (at the head of the brook where we found water on the 1st), and rested two hours to allow our horses to feed, as they had neither eaten nor drunk for the last forty-eight hours. Resuming our journey along the brook (which I n…					WINDICH BROOK.	Windich Brook	Explorations in Australia - Chapter 2. FIRST EXPEDITION IN SEARCH OF LEICHARDT.
Day 80. Mount Margaret ()	-28.83139,122.1906	04/07/1869		Travelling about West-South-West for twelve miles, we reached the pool of water found on our outward track on the 30th June, two miles and a half South-West from Mount Margaret. There we rested an hour. Resuming, we travelled nearly along our outward track for eighteen miles, and camped without water on a small patch of feed. Tommy shot two wurrongs to-day.					WINDICH BROOK.	Mount Margaret	Explorations in Australia - Chapter 2. FIRST EXPEDITION IN SEARCH OF LEICHARDT.
Day 81. Mount Malcolm ()	-28.88869,121.4578	05/07/1869		Started at daybreak, and, continuing nearly along our outward track for twenty-five miles, we reached the water close to Mount Malcolm, where we left the party, they having shifted, as instructed, seventeen miles farther back. There we rested an hour; but, having finished our provisions, we roasted two wurrongs and made a first-rate dinner. Tommy also shot an emu that came to water, and which we …					WINDICH BROOK.	Mount Malcolm	Explorations in Australia - Chapter 2. FIRST EXPEDITION IN SEARCH OF LEICHARDT.
Day 81. CampSite (lat/long)	-28.916667,121.166667	05/07/1869		Started at daybreak, and, continuing nearly along our outward track for twenty-five miles, we reached the water close to Mount Malcolm, where we left the party, they having shifted, as instructed, seventeen miles farther back. There we rested an hour; but, having finished our provisions, we roasted two wurrongs and made a first-rate dinner. Tommy also shot an emu that came to water, and which we …					WINDICH BROOK.	CampSite	Explorations in Australia - Chapter 2. FIRST EXPEDITION IN SEARCH OF LEICHARDT.
Day 82. CampSite (lat/long)	-28.916667,121.166667	06/07/1869		Weighed all the rations, and found we had 283 pounds flour, 31 pounds bacon, 28 pounds sugar, and 4 pounds tea--equal to thirty-two days' allowance of flour, ten days' bacon, nineteen days' sugar, and twenty-one days' tea on a full ration. Thereupon concluded to return to Perth as quickly as possible, and reduce the allowance of tea and sugar to last thirty days--bacon to be done without. By that…					WINDICH BROOK.	CampSite	Explorations in Australia - Chapter 2. FIRST EXPEDITION IN SEARCH OF LEICHARDT.
Day 83. CampSite (lat/long)	-28.950000,120.916667	07/07/1869		At 6.30 a.m., barometer 28 86, thermometer 34 degrees. Started on the return, and followed along our outward tracks for sixteen miles. Camped on east side of granite range, in south latitude 28 degrees 57 minutes, and east longitude 120 degrees 55 minutes.					THE RETURN JOURNEY.	CampSite	Explorations in Australia - Chapter 2. FIRST EXPEDITION IN SEARCH OF LEICHARDT.
Day 84. Two Springs ()	-28.88111,120.5139	08/07/1869		Travelling nearly along our eastward track, and passing our bivouac of the 19th June, we reached the Two Springs bivouac.					THE RETURN JOURNEY.	Two Springs	Explorations in Australia - Chapter 2. FIRST EXPEDITION IN SEARCH OF LEICHARDT.
Day 85. campsite (lat/long)	-28.892778,120.15	09/07/1869		Travelled twenty-two miles, and reached our bivouac of 30th May--129 degrees 9 minutes East.					THE RETURN JOURNEY.	campsite	Explorations in Australia - Chapter 2. FIRST EXPEDITION IN SEARCH OF LEICHARDT.
Day 86. Mount Alfred ()	-28.85537,119.9923	10/07/1869		Reached the bivouac of May 27th. On our way I ascended a very high range, which I named Mount Alfred, and took a fine round of angles--Mount Alexander, Mount Bivou, Mount Ida, Mount Elvire, and Yeadie and Bulgar being visible.					THE RETURN JOURNEY.	Mount Alfred	Explorations in Australia - Chapter 2. FIRST EXPEDITION IN SEARCH OF LEICHARDT.
Day 86. CampSite (lat/long)	-28.883333,119.833333	10/07/1869		Reached the bivouac of May 27th. On our way I ascended a very high range, which I named Mount Alfred, and took a fine round of angles--Mount Alexander, Mount Bivou, Mount Ida, Mount Elvire, and Yeadie and Bulgar being visible.					THE RETURN JOURNEY.	CampSite	Explorations in Australia - Chapter 2. FIRST EXPEDITION IN SEARCH OF LEICHARDT.
Day 87. CampSite (lat/long)	-28.883333,119.833333	11/07/1869		Plotted up our track.					THE RETURN JOURNEY.	CampSite	Explorations in Australia - Chapter 2. FIRST EXPEDITION IN SEARCH OF LEICHARDT.
Day 88. CampSite (lat/long)	-28.963333,119.466667	12/07/1869		Travelled for twenty-five miles and camped on a splendid patch of feed, with a little water on some granite rocks about two miles west of our bivouac of the 24th. This I found to be in south latitude 28 degrees 57 minutes 48 seconds by meridian altitudes of Bootes (Arcturus) and Pegasi (Markab), and in longitude about 119 degrees 28 minutes east; Mount Elvire bearing North 154 degrees East magnet…					THE RETURN JOURNEY.	CampSite	Explorations in Australia - Chapter 2. FIRST EXPEDITION IN SEARCH OF LEICHARDT.
Day 89. CampSite (?)	-29.261075,119.603817	13/07/1869		Leaving the party in charge of Mr. Monger, with instructions to proceed to Retreat Rock--our bivouac of May 23rd--I started with Mr. Hamersley and Jemmy to attempt to cross Lake Barlee, in order to explore the country on its south side, near Mount Elvire, as well as to try and find natives, Jemmy being acquainted with these tribes. Steering North 154 degrees East magnetic for seven miles, we came…					THE RETURN JOURNEY.	CampSite	Explorations in Australia - Chapter 2. FIRST EXPEDITION IN SEARCH OF LEICHARDT.
Day 90. Mount Elvire ()	-29.25788,119.6367	14/07/1869		This morning, after ascending a range to have a view of the country, steered North 288 degrees East magnetic, and then, travelling six miles, came to a branch of Lake Barlee running far to the southward, which we attempted to cross; but after travelling a mile and a half, the horses went down to their girths in the bog, and we had great difficulty in getting them to return, which, however, we ult…					THE RETURN JOURNEY.	Mount Elvire	Explorations in Australia - Chapter 2. FIRST EXPEDITION IN SEARCH OF LEICHARDT.
Day 90. CampSite (?)	-29.205448,119.413017	14/07/1869		This morning, after ascending a range to have a view of the country, steered North 288 degrees East magnetic, and then, travelling six miles, came to a branch of Lake Barlee running far to the southward, which we attempted to cross; but after travelling a mile and a half, the horses went down to their girths in the bog, and we had great difficulty in getting them to return, which, however, we ult…					THE RETURN JOURNEY.	CampSite	Explorations in Australia - Chapter 2. FIRST EXPEDITION IN SEARCH OF LEICHARDT.
Day 91. CampSite (?)	-29.064167,119.266667	15/07/1869		Having finished our rations last night, we started at dawn, and steered towards Retreat Rock. where we were to meet the party. After travelling five miles, we came to that part of Lake Barlee which we attempted to cross, without success, on May 19th (on our outward track); but, leading our horses, we at last succeeded in crossing, and reached camp, all very tired, at twelve o'clock, finding all w…					THE RETURN JOURNEY.	CampSite	Explorations in Australia - Chapter 2. FIRST EXPEDITION IN SEARCH OF LEICHARDT.
Day 92. Yeeramudder Hill ()	-29.08427,119.0684	16/07/1869		Considerable delay having occurred in collecting the horses, we did not start till ten o'clock, when we travelled nearly along our outward track--passing Yeeramudder Hill, from the summit of which Mount Elvire bore North 111 degrees 30 minutes East magnetic about thirty-five miles distant--for about twenty-one miles, and bivouacked at some granite rocks with a little feed around them, which I fou…					THE RETURN JOURNEY.	Yeeramudder Hill	Explorations in Australia - Chapter 2. FIRST EXPEDITION IN SEARCH OF LEICHARDT.
Day 92. CampSite (lat/long)	-29.146389,118.983333	16/07/1869		Considerable delay having occurred in collecting the horses, we did not start till ten o'clock, when we travelled nearly along our outward track--passing Yeeramudder Hill, from the summit of which Mount Elvire bore North 111 degrees 30 minutes East magnetic about thirty-five miles distant--for about twenty-one miles, and bivouacked at some granite rocks with a little feed around them, which I fou…					THE RETURN JOURNEY.	CampSite	Explorations in Australia - Chapter 2. FIRST EXPEDITION IN SEARCH OF LEICHARDT.
Day 93. CampSite (?)	-29.120278,118.569313	17/07/1869		Started at 8.45 a.m., and, steering about west for twenty-five miles through dense thickets without feed, we camped without water on a small miserable patch, in south latitude 29 degrees 7 minutes 13 seconds by meridian altitude of Bootes (Arcturus). Marked a small tree with F. 1869. Being now in friendly country, I decided to give up keeping watch, which had been done regularly for the last two …					THE RETURN JOURNEY.	CampSite	Explorations in Australia - Chapter 2. FIRST EXPEDITION IN SEARCH OF LEICHARDT.
Day 94. Warne ()	-29.32762,118.0498	18/07/1869		After starting the party, went, in company with Tommy Windich, to take bearings from a low hill, bearing North 289 degrees, distant about eight miles, after which we struck in the direction in which we expected to find the party; but as, for some reason or other, they had not passed by, I anticipated they must have met with good feed and water, and camped, it being Sunday. However this may be, we…					MOUNT SINGLETON.	Warne	Explorations in Australia - Chapter 2. FIRST EXPEDITION IN SEARCH OF LEICHARDT.
Day 95. CampSite (?)	-29.209691,118.451241	19/07/1869		Made a first-rate breakfast off the remainder of the turkey, and then started in search of the party, making back towards where we had left them, keeping well to the southward. After spending nearly the whole of the day, and knocking up the horses, we found the tracks of the party nearly where we had left them yesterday morning, and, following along them for nine miles, found where they had bivou…					MOUNT SINGLETON.	CampSite	Explorations in Australia - Chapter 2. FIRST EXPEDITION IN SEARCH OF LEICHARDT.
Day 96. Meroin ()	-29.19123,118.135	20/07/1869		Starting on the tracks at daybreak, followed them for about thirteen miles, and then we found the party encamped on the east side of a large bare granite rock called Meroin, Mount Kenneth bearing North 24 degrees East magnetic, about fifteen miles distant. From a cliff, about one mile west of the camp, took a splendid round of angles, Mount Kenneth, Mount Singleton, and several other known points…					MOUNT SINGLETON.	Meroin	Explorations in Australia - Chapter 2. FIRST EXPEDITION IN SEARCH OF LEICHARDT.
Day 96. CampSite (lat/long)	-29.180278,118.233333	20/07/1869		Starting on the tracks at daybreak, followed them for about thirteen miles, and then we found the party encamped on the east side of a large bare granite rock called Meroin, Mount Kenneth bearing North 24 degrees East magnetic, about fifteen miles distant. From a cliff, about one mile west of the camp, took a splendid round of angles, Mount Kenneth, Mount Singleton, and several other known points…					MOUNT SINGLETON.	CampSite	Explorations in Australia - Chapter 2. FIRST EXPEDITION IN SEARCH OF LEICHARDT.
Day 97. Pullagooroo ()	-29.10206,117.8028	21/07/1869		At seven a.m., barometer 29.10; thermometer 35 degrees. Started at 8.15 a.m. Steered about west for fifteen miles, over country studded here and there with granite rocks, with good feed around them--in some places rock poison--and then camped at a spring called Pullagooroo, bearing North 189 degrees from a bare granite hill, three quarters of a mile distant, from which hill Mount Singleton bore N…					MOUNT SINGLETON.	Pullagooroo	Explorations in Australia - Chapter 2. FIRST EXPEDITION IN SEARCH OF LEICHARDT.
Day 98. Bunnaroo (lat/long)	-28.966667,117.583333	22/07/1869		Steering a little to the north of west, through dense thickets without grass, we bivouacked at a very grassy spot called Bunnaroo, from which Mount Singleton bore North 205 degrees East magnetic. By meridian altitudes of a Bootes (Arcturus), E Bootes, and Coronae Borealis, camp is in south latitude 28 degrees 58 minutes, and in longitude about 117 degrees 35 minutes east.					MOUNT SINGLETON.	Bunnaroo	Explorations in Australia - Chapter 2. FIRST EXPEDITION IN SEARCH OF LEICHARDT.
Day 99. campsite (lat/long)	-29.409167,117.333333	23/07/1869		After starting the party with instructions to proceed straight to Mount Singleton, distant about thirty-two miles, I went, in company with Jemmy, to the summit of a high trap range in order to take a round of angles, and fix Nanjajetty, which was visible. While on our way to join the party, saw the tracks of two men and two horses, with two natives walking, and soon after found where they had biv…					MOUNT SINGLETON.	campsite	Explorations in Australia - Chapter 2. FIRST EXPEDITION IN SEARCH OF LEICHARDT.
Day 100. Mount Singleton ()	-29.46624,117.2987	24/07/1869		There being splendid green feed around Mount Singleton, and as the horses were tired, I concluded to give them a day's rest. Went, in company with Mr. Monger and Jemmy, to the summit of Mount Singleton, which took us an hour to ascend; but, on reaching it, we were well repaid for the trouble by the very extensive view and the many points to which I could take bearings. Far as the eye could reach …					MOUNT SINGLETON.	Mount Singleton	Explorations in Australia - Chapter 2. FIRST EXPEDITION IN SEARCH OF LEICHARDT.
Day 100. CampSite (lat/long)	-29.409167,117.333333	24/07/1869		There being splendid green feed around Mount Singleton, and as the horses were tired, I concluded to give them a day's rest. Went, in company with Mr. Monger and Jemmy, to the summit of Mount Singleton, which took us an hour to ascend; but, on reaching it, we were well repaid for the trouble by the very extensive view and the many points to which I could take bearings. Far as the eye could reach …					MOUNT SINGLETON.	CampSite	Explorations in Australia - Chapter 2. FIRST EXPEDITION IN SEARCH OF LEICHARDT.
Day 101. CampSite (lat/long)	-29.409167,117.333333	25/07/1869		Rested at camp near Mount Singleton, which I found to be in south latitude 29 degrees 24 minutes 33 seconds by meridian altitude of sun, and longitude about 117 degrees 20 minutes east.					MOUNT SINGLETON.	CampSite	Explorations in Australia - Chapter 2. FIRST EXPEDITION IN SEARCH OF LEICHARDT.
Day 102. campsite (?)	-29.363333,116.985053	26/07/1869		Some delay having occurred in collecting the horses, did not start till 9 a.m., when we steered a little to the north of west towards Damparwar. For the first seven miles over rough trap hills lightly grassed, when we entered samphire and saltbush flats for four miles. Crossing a large marsh at a point where it was only 100 yards wide, and continuing through thickets, we camped at a spot with ver…					MOUNT SINGLETON.	campsite	Explorations in Australia - Chapter 2. FIRST EXPEDITION IN SEARCH OF LEICHARDT.
Day 103. Damparwar Spring ()	-29.28346,116.7101	27/07/1869		Steering a little to the north of west for eighteen miles, we reached Damparwar Springs, a clear grassy spot of about 300 acres, on west side of a low granite hill. The spring was dry, but by digging a few feet obtained abundant supply. From the appearance of the country there has hardly been any rain in this neighbourhood for many months. Took a round of angles from a trap hill about two miles d…					MOUNT SINGLETON.	Damparwar Spring	Explorations in Australia - Chapter 2. FIRST EXPEDITION IN SEARCH OF LEICHARDT.
Day 104. Lake Monger (Mongers Lake)	-29.48569,116.6917	28/07/1869		Steering in a southerly direction, and following along the western margin of a salt lake--most of the way over samphire flats, with thickets intervening, denser than usual--we encamped on a small grassy spot, with plenty of water in granite rocks, called Murrunggnulgo, situated close to the west side of the lake, which I named Lake Monger. The native Jemmy, in company with some of his friends, st…					MOUNT SINGLETON.	Lake Monger	Explorations in Australia - Chapter 2. FIRST EXPEDITION IN SEARCH OF LEICHARDT.
Day 104. Murrunggnulgo (?)	-29.622222,116.683296	28/07/1869		Steering in a southerly direction, and following along the western margin of a salt lake--most of the way over samphire flats, with thickets intervening, denser than usual--we encamped on a small grassy spot, with plenty of water in granite rocks, called Murrunggnulgo, situated close to the west side of the lake, which I named Lake Monger. The native Jemmy, in company with some of his friends, st…					MOUNT SINGLETON.	Murrunggnulgo	Explorations in Australia - Chapter 2. FIRST EXPEDITION IN SEARCH OF LEICHARDT.
Day 105. Bera Bera ()	-30.00569,116.8178	29/07/1869		Moving a little to the west of south for twenty miles, through dense thickets, by far the worst we have ever encountered, and destitute of feed, we reached Bera Bera, a grassy spot with a dry well, where water might be procured. Continuing North 238 degrees East for about five miles, we reached and camped at some granite rocks, with a fine well of water called Wandanno, which I found to be in sou…					MOUNT SINGLETON.	Bera Bera	Explorations in Australia - Chapter 2. FIRST EXPEDITION IN SEARCH OF LEICHARDT.
Day 105. Wandanno ()	-29.99736,116.7256	29/07/1869		Moving a little to the west of south for twenty miles, through dense thickets, by far the worst we have ever encountered, and destitute of feed, we reached Bera Bera, a grassy spot with a dry well, where water might be procured. Continuing North 238 degrees East for about five miles, we reached and camped at some granite rocks, with a fine well of water called Wandanno, which I found to be in sou…					MOUNT SINGLETON.	Wandanno	Explorations in Australia - Chapter 2. FIRST EXPEDITION IN SEARCH OF LEICHARDT.
Day 106. Gnookadunging ()	-30.09875,116.5178	30/07/1869		Travelling about North 212 degrees East magnetic for fourteen miles, over samphire flats, with thickets intervening, we reached a fine grassy spot, with water in granite rocks, called Gnookadunging. Continuing about south for two and a half miles, passed another small grassy spot called Ginbinning; thence in about the general direction of North 210 degrees East magnetic. For about eleven and a ha…					MOUNT SINGLETON.	Gnookadunging	Explorations in Australia - Chapter 2. FIRST EXPEDITION IN SEARCH OF LEICHARDT.
Day 106. Ginbinning ()	-30.13209,116.5178	30/07/1869		Travelling about North 212 degrees East magnetic for fourteen miles, over samphire flats, with thickets intervening, we reached a fine grassy spot, with water in granite rocks, called Gnookadunging. Continuing about south for two and a half miles, passed another small grassy spot called Ginbinning; thence in about the general direction of North 210 degrees East magnetic. For about eleven and a ha…					MOUNT SINGLETON.	Ginbinning	Explorations in Australia - Chapter 2. FIRST EXPEDITION IN SEARCH OF LEICHARDT.
Day 106. Manginie (?)	-30.350000,116.420345	30/07/1869		Travelling about North 212 degrees East magnetic for fourteen miles, over samphire flats, with thickets intervening, we reached a fine grassy spot, with water in granite rocks, called Gnookadunging. Continuing about south for two and a half miles, passed another small grassy spot called Ginbinning; thence in about the general direction of North 210 degrees East magnetic. For about eleven and a ha…					MOUNT SINGLETON.	Manginie	Explorations in Australia - Chapter 2. FIRST EXPEDITION IN SEARCH OF LEICHARDT.
Day 107. Cooroo Springs (?)	-30.523984,116.337310	31/07/1869		Steering about South-South-West for thirteen miles, we reached Cooroo Springs--a fine grassy spot in winter--where we camped, the horses being very tired. For the first seven miles over scrubby sand-plains; thence to Cooroo, over grassy country, with spearwood thickets intervening. Tommy shot a kangaroo this afternoon, which was very acceptable, having had only damper and tea for several days pas…					MOUNT SINGLETON.	Cooroo Springs	Explorations in Australia - Chapter 2. FIRST EXPEDITION IN SEARCH OF LEICHARDT.
Day 108. Cooroo Springs (?)	-30.523984,116.337310	01/08/1869		Rested at Cooroo Springs. All very busy putting our ragged clothes in as good repair as possible. By meridian altitudes of sun, Lyrae (Vega), 32 degrees 15 minutes. Read Divine Service. Jemmy has not yet overtaken us, so I conclude he has changed his mind, and does not intend following us. We are now about nine miles from Clarke's homestead, which bears about South-South-East.					MOUNT SINGLETON.	Cooroo Springs	Explorations in Australia - Chapter 2. FIRST EXPEDITION IN SEARCH OF LEICHARDT.
Day 109. Mr. Donald Macpherson's (?)	-30.869547, 116.324598	02/08/1869		Travelling about South-South-East for nine miles over grassy country, with York gums, etc., we reached the hospitable residence of Mr. Clarke, where we were very kindly received, and stayed a short time to hear the news. Resuming for eighteen miles along the road to Newcastle, we passed Mr. Donald Macpherson's, where I obtained some rations, and pushed on six miles farther, and bivouacked one mil…					MOUNT SINGLETON.	Mr. Donald Macpherson's	Explorations in Australia - Chapter 2. FIRST EXPEDITION IN SEARCH OF LEICHARDT.
Day 109. Badgy-Badgy (Badji Badji Brook ?)	-30.94849,116.2406	02/08/1869		Travelling about South-South-East for nine miles over grassy country, with York gums, etc., we reached the hospitable residence of Mr. Clarke, where we were very kindly received, and stayed a short time to hear the news. Resuming for eighteen miles along the road to Newcastle, we passed Mr. Donald Macpherson's, where I obtained some rations, and pushed on six miles farther, and bivouacked one mil…					MOUNT SINGLETON.	Badgy-Badgy	Explorations in Australia - Chapter 2. FIRST EXPEDITION IN SEARCH OF LEICHARDT.
Day 110. CampSite (?)	-31.332369,116.347225	03/08/1869		Travelling along the road towards Newcastle for twenty-six miles, we camped one mile past Byen, and about sixteen miles from Newcastle.					MOUNT SINGLETON.	CampSite	Explorations in Australia - Chapter 2. FIRST EXPEDITION IN SEARCH OF LEICHARDT.
Day 111. Newcastle (Newcastle Bridge)	-31.54917,116.4625	04/08/1869		Reached Newcastle at eleven o'clock, and had just time to report the safe return of the expedition before the mail left.					MOUNT SINGLETON.	Newcastle	Explorations in Australia - Chapter 2. FIRST EXPEDITION IN SEARCH OF LEICHARDT.
Day 112. Baylup (Bailup)	-31.72544,116.2773	05/08/1869		After handing over all the horses provided by the different settlers to their respective owners, and bidding farewell to Mr. George Monger (who intends proceeding to York), I left Newcastle in company with Mr. M. Hamersley and Tommy Windich, leaving Morgan and remainder of equipment to follow with the cart which had been brought to Newcastle by Ward and C. Adams. Reached Baylup at 4 p.m.					MOUNT SINGLETON.	Baylup	Explorations in Australia - Chapter 2. FIRST EXPEDITION IN SEARCH OF LEICHARDT.
Day 113. Guildford ()	-31.89933,115.9687	06/08/1869		Made an early start; reached Guildford at twelve o'clock, where we rested an hour. Then resuming, reached Perth at 4 p.m., and reported personally the results of the expedition, having been absent 113 days, in which time I travelled by computation over 2000 miles.					MOUNT SINGLETON.	Guildford	Explorations in Australia - Chapter 2. FIRST EXPEDITION IN SEARCH OF LEICHARDT.
Day 113. Perth ()	-31.95184,115.8587	06/08/1869		Made an early start; reached Guildford at twelve o'clock, where we rested an hour. Then resuming, reached Perth at 4 p.m., and reported personally the results of the expedition, having been absent 113 days, in which time I travelled by computation over 2000 miles.					MOUNT SINGLETON.	Perth	Explorations in Australia - Chapter 2. FIRST EXPEDITION IN SEARCH OF LEICHARDT.
