# Supplementary figures and images for: Exploring Historical Australian Expeditions with Time-Layered Cultural Maps
Source: MDPI journal article supplement (doi:10.3390/ijgi12030104), 2023-03-02

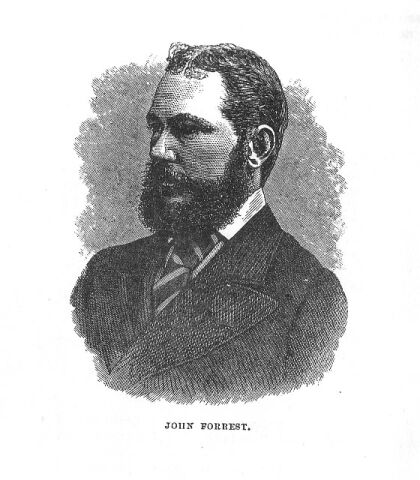

Supplement: s1 [file s1 › Figure S1-John Forrest.jpg]
